# Supplementary material for: Investigating locally relevant risk factors for Campylobacter infection in Australia: protocol for a case–control study and genomic analysis
Source: PubMed Central journal article supplement — BMJ Open. 2018 Dec 22;8(12):e026630. doi: 10.1136/bmjopen-2018-026630 (PMC6318611; doi:10.1136/bmjopen-2018-026630), 2018-12-22
Supplement: bmjopen-2018-026630.draft_revisions.pdf [file bmjopen-2018-026630.draft_revisions.pdf]

# BMJ Open

BMJ Open is committed to open peer review. As part of this commitment we make the peer review history of every article we publish publicly available.

When an article is published we post the peer reviewers' comments and the authors' responses online. We also post the versions of the paper that were used during peer review. These are the versions that the peer review comments apply to.

The versions of the paper that follow are the versions that were submitted during the peer review process. They are not the versions of record or the final published versions. They should not be cited or distributed as the published version of this manuscript.

BMJ Open is an open access journal and the full, final, typeset and author-corrected version of record of the manuscript is available on our site with no access controls, subscription charges or pay-per-view fees (<http://bmjopen.bmj.com>).

If you have any questions on BMJ Open's open peer review process please email [editorial.bmjopen@bmj.com](mailto:editorial.bmjopen@bmj.com)

# BMJ Open

## Investigating locally-relevant risk factors for *Campylobacter* infection in Australia: protocol for a case-control study and genomic analysis

|                               |                                                                                                                                                                                                                                                                                                                                                                                                                                                                                                                                                                                                                                                         |
|-------------------------------|---------------------------------------------------------------------------------------------------------------------------------------------------------------------------------------------------------------------------------------------------------------------------------------------------------------------------------------------------------------------------------------------------------------------------------------------------------------------------------------------------------------------------------------------------------------------------------------------------------------------------------------------------------|
| Journal:                      | <i>BMJ Open</i>                                                                                                                                                                                                                                                                                                                                                                                                                                                                                                                                                                                                                                         |
| Manuscript ID                 | bmjopen-2018-026630                                                                                                                                                                                                                                                                                                                                                                                                                                                                                                                                                                                                                                     |
| Article Type:                 | Protocol                                                                                                                                                                                                                                                                                                                                                                                                                                                                                                                                                                                                                                                |
| Date Submitted by the Author: | 17-Sep-2018                                                                                                                                                                                                                                                                                                                                                                                                                                                                                                                                                                                                                                             |
| Complete List of Authors:     | Varrone, Liana; University of Queensland, Faculty of Medicine; Menzies School of Health Research, Stafford, Russell; Queensland Health, OzFoodNet<br>Lilly, Kim; Hunter New England Population Health<br>Selvey, Linda; University of Queensland, Faculty of Medicine<br>Glass, Kathryn; The Australian National University, National Centre for Epidemiology and Population Health<br>Ford, Laura; Australian National University, College of Health and Medicine<br>Bulach, Dieter; The University of Melbourne, Melbourne Bioinformatics<br>Kirk, Martyn; The Australian National University, National Centre for Epidemiology and Population Health |
| Keywords:                     | Epidemiology < INFECTIOUS DISEASES, Gastrointestinal infections < GASTROENTEROLOGY, Public health < INFECTIOUS DISEASES                                                                                                                                                                                                                                                                                                                                                                                                                                                                                                                                 |
|                               |                                                                                                                                                                                                                                                                                                                                                                                                                                                                                                                                                                                                                                                         |

SCHOLARONE™  
Manuscripts

## Investigating locally-relevant risk factors for *Campylobacter* infection in Australia: protocol for a case-control study and genomic analysis

Liana Varrone<sup>1</sup> Darwin, Australia.

Russell J. Stafford<sup>2</sup> Brisbane, Australia.

Kim Lilly<sup>3</sup> Newcastle, Australia.

Linda Selvey<sup>1</sup> Brisbane, Australia.

Kathryn Glass<sup>4</sup> Canberra, Australia.

Laura Ford<sup>4</sup> Canberra, Australia.

Dieter Bulach<sup>5,6</sup> Melbourne, Australia.

Martyn D. Kirk<sup>4</sup> Canberra, Australia.

On behalf of The CampySource Project Team

1. The University of Queensland, Faculty of Medicine.
2. Queensland Health, OzFoodNet.
3. Hunter New England Population Health.
4. The Australian National University, College of Health and Medicine.
5. The University of Melbourne, Melbourne Bioinformatics.
6. The Peter Doherty Institute, Microbiological Diagnostic Unit Public Health Laboratory.

Corresponding author: Martyn Kirk

Postal address: 62 Mills Road, Acton, ACT 2601, Australia

Email address: martyn.kirk@anu.edu.au

Telephone number: +612 6125 5609

Word count: 3,929

(excl. title page, abstract, references, figures & tables)

## ABSTRACT

### Introduction:

The CampySource project aims to identify risk factors for human *Campylobacter* infection in Australia. We will investigate locally-relevant risk factors and those significant in international studies in a case-control study. Case isolates and contemporaneous isolates from food and animal sources will be sequenced to conduct source attribution modelling, and findings will be combined with the case-control study in a source-assigned analysis.

### Methods and analysis:

The case-control study will include 1,200 participants (600 cases and 600 controls) across three regions in Australia. Cases will be recruited from campylobacteriosis notifications to health departments. Only those with a pure and viable *Campylobacter* isolate will be eligible for selection to allow for whole genome sequencing of isolates. Controls will be recruited from notified cases of influenza, frequency matched by sex, age group and geographical area of residence. All participants will be interviewed by trained telephone interviewers using a piloted questionnaire.

We will collect *Campylobacter* isolates from retail meats and companion animals (specifically dogs), and all food, animal and human isolates will undergo whole genome sequencing. We will use sequence data to estimate the proportion of human infections that can be attributed to animal and food reservoirs (source attribution modelling), and to identify spatial clusters and temporal trends. Source-assigned analysis of the case-control study data will also be conducted where cases are grouped according to attributed sources.

### Ethics and dissemination:

Human and animal ethics have been approved. Genomic data will be published in online archives accompanied by basic metadata. We anticipate several publications to come from this study.

### KEYWORDS

*Campylobacter*, case-control study, risk factors, Australia, whole genome sequencing, source attribution, source-assigned analysis

## ARTICLE SUMMARY

### Strengths and limitations of this study

- Case-control study is well-powered to identify locally-relevant risk factors.
- Linking genomic data to the case-control study strengthens the analysis by enabling source attribution and source-assigned analyses to be conducted.
- Case-control questionnaire questions are being validated in a separate study, demonstrating the reliability of participant recall.
- Potential reporting bias due to inaccurate recall of study participants.
- Case-control study lacks efficiency for risk factors with high levels of exposure in the study population.

## INTRODUCTION

*Campylobacter* infection is the most commonly notified cause of foodborne gastroenteritis in Australia,<sup>1-3</sup> as well as a leading cause of bacterial gastroenteritis world-wide.<sup>4</sup> At the introduction of Australia's National Notifiable Diseases Surveillance System (NNDSS) in 1991 the incidence rate of notified campylobacteriosis cases was 79.1/100,000 population,<sup>5</sup> and despite notification rates plateauing in recent years, incidence had risen to 139.7/100,000 population in Australia in 2015,<sup>5</sup> with an estimated 10 cases for every notified case within the community.<sup>6</sup> By comparison, the incidence rate of campylobacteriosis in New Zealand in 2014 was 150.3/100,000 population,<sup>7</sup> with an estimated 10-30 cases in the community for every notified case.<sup>8</sup> *Campylobacter* notification rates in Australia and New Zealand are still among the highest in the world across high-income countries. Most countries in the European Union consistently report annual campylobacteriosis notification rates below 100/100,000 population.<sup>2</sup>

Two species of *Campylobacter*—*Campylobacter jejuni* and *C. coli*—contribute to approximately 95% of human campylobacteriosis.<sup>9</sup> These *Campylobacter* species are commonly detected in sewage and surface water,<sup>10</sup> reside in the gastrointestinal tract of birds and animals,<sup>11</sup> and are frequently found in raw meat, particularly poultry, and raw milk.<sup>12 13</sup> Campylobacteriosis is mostly foodborne, with an estimated 77% of cases transmitted via food consumption in Australia.<sup>14 15</sup> Direct and indirect zoonotic transmission can occur via animal contact (direct) or faecally-contaminated water or environments (indirect). Person-to-person transmission is considered rare.<sup>16</sup> The majority of cases are thought to be sporadic, with outbreaks less commonly detected.<sup>17</sup> Most outbreaks are linked to the consumption of poultry, raw milk, or contaminated water.<sup>17 18</sup>

1  
2  
3 Targeted control of foodborne bacterial pathogens generally depends on identification of sources  
4 and routes of transmission. Since *Campylobacter* are ubiquitous in the environment and most cases  
5 are sporadic, identifying sources is difficult. Source attribution methods require isolation of strains  
6 from reservoirs to compare *Campylobacter* strain diversity in foods and animals to that in human  
7 infections. Beef, sheep and pig meat have a lower prevalence of *Campylobacter* contamination than  
8 chicken meat (<5% to 14%),<sup>19-21</sup> but a higher prevalence is found in animal offal such as liver,<sup>22</sup> thus  
9 making offal a valuable source of host-associated strains of *Campylobacter* in low-prevalence meats.  
10  
11  
12  
13

## 14 **STUDY RATIONALE**

15  
16 In the United States, evidence from case-control studies have led to policy change, including changes  
17 to chicken slaughtering techniques. The incidence of human *Campylobacter* infection has declined in  
18 the US since this policy was introduced in 1997.<sup>23</sup> More recently, evidence from source attribution  
19 analyses in New Zealand has led to the development of poultry production policies and practices  
20 aimed at reducing the risk of *Campylobacter* transmission via poultry food products.<sup>24</sup> New Zealand  
21 has seen a 74% reduction in the number of campylobacteriosis cases attributed to poultry in the  
22 region, as well as a 54% reduction in cases overall.<sup>25</sup>  
23  
24  
25  
26  
27

28 Source attribution modelling enables us to determine which foods and animals are the most likely  
29 sources of infection with each *Campylobacter* strain type, and the proportion of cases attributed to  
30 each source. This can be done with simple proportional similarity index (PSI) calculations, or by using  
31 more complex models.<sup>24</sup> Source attribution also allows for human campylobacteriosis cases to be  
32 grouped by potential source, increasing the specificity of risk factor analyses. These source-assigned  
33 analyses combine the epidemiological information gained through the traditional case-control study  
34 with source attribution modelling to provide greater explanatory power to investigate locally-  
35 relevant risk factors.  
36  
37  
38  
39  
40

## 41 **OBJECTIVES**

42 This study aims to:

- 43 1. Identify dietary, environmental and behavioural risk factors for *Campylobacter* infection in  
44 Australia
  - 45 2. Strengthen the epidemiological evidence for previously identified risk factors in Australia
  - 46 3. Identify strain-specific risk factors for infection using Whole Genome Sequencing (WGS) data  
47 from case isolates
- 48  
49  
50  
51  
52  
53

## 54 **HYPOTHESES**

We will test several hypotheses regarding specific risk factors for *Campylobacter* infection in Australia. The hypotheses are based on exposures which have previously been identified as risk factors for *Campylobacter* infection in Australia as well as internationally.

We hypothesise that:

1. Persons who consume undercooked meats, particularly chicken, are at increased risk of infection.
2. Persons who consume offal are at increased risk of infection.
3. Persons who own companion animals (especially puppies) are at increased risk of infection.
4. Poor food hygiene and handling practices in the home increase the risk of infection.
5. Most human infections will be attributed to consumption of chicken meat.
6. There will be a high level of genetic diversity amongst *Campylobacter* strains.

## STUDY DESIGN

We will conduct a case-control study including genomic testing over a two-year period in three sentinel sites: the state of Queensland (QLD), the Australian Capital Territory (ACT), and Hunter New England (HNE) region of New South Wales (Figure 1). Sporadic cases of culture-positive *Campylobacter* infection will be identified either through state notifiable disease registers, from local pathology service databases or local notification databases. An isolate from each case will be paired with epidemiological data from the case interview. One control will be recruited for each case who participates in the study, with trained interviewers conducting telephone interviews with both cases and controls. Participants will be interviewed using a questionnaire that has been specifically designed to collect information on known potential risk factors. This questionnaire will include a selection of questions being validated in a separate study (Liana Varrone, Validation of questions designed for gastroenteritis investigation). For cases, the questions will cover the seven days prior to the onset of illness, while controls will be questioned on the seven days prior to interview. Meanwhile, *Campylobacter* isolates will also be collected from food and animal samples. All human and non-human isolates will undergo whole genome sequencing for comparison in source attribution modelling. Data for this study will be collected from 1<sup>st</sup> March 2017 to 1<sup>st</sup> March 2019.

**Figure 1. Map of Australian states and territories, showing the Hunter New England region.**

**(Adapted from figure 1 in Eastwood *et al.* 2010)<sup>26</sup>**

## Patient and public involvement

To develop the study, we engaged state and territory health departments, food safety agencies and industry to establish research questions and methods. The process involved a dedicated workshop, followed by teleconferences and an iterative process of drafting study documentation. We also established a reference panel, which includes representatives from senior levels of government and industry bodies. No patients or other members of the public were involved in the development of this study.

## STUDY POPULATION

The three sentinel sites cover a population of approximately 6.1 million people. Based on notification and diagnostic pathology data, we expect approximately 8,650 *Campylobacter* cases to be notified across these sites during the study period.

## DEFINITION AND SELECTION OF CASES

### Case definition

We define a case as a person from any of the three participating sites with a recent history of acute diarrhoea and a culture-positive stool result for *Campylobacter*.

## SAMPLE SIZE

We used risk factor prevalence data from a previous national *Campylobacter* case-control study in 2001/2002 to estimate sample size for this study.<sup>27</sup> For example, the prevalence of chicken consumption among controls in 2001/2002 was 80%. A sample size of approximately 1,040 subjects (520 cases; 520 controls) would enable the study to detect an association between chicken consumption and illness with an odds ratio of 1.6, at 80% power and  $\alpha = 0.05$ , as reported in the previous study. Sample size estimates for other potential risk factors are listed in Table 1.

**Table 1. Sample size estimates for an unmatched case-control study**

| Risk factor | Prevalence of exposure among controls (%) | Prevalence of exposure among cases (%) | Odds ratio | No. of required study subjects |
|-------------|-------------------------------------------|----------------------------------------|------------|--------------------------------|
| Beef        | 78                                        | 85                                     | 1.6        | 960                            |
| Pork        | 52                                        | 60                                     | 1.4        | 1130                           |
| Lamb        | 42                                        | 50                                     | 1.4        | 1120                           |
| Chicken     | 80                                        | 87                                     | 1.6        | 1040                           |
| Offal       | 2.0                                       | 5.0                                    | 2.6        | 1154                           |
| Puppies     | 2.1                                       | 5.4                                    | 2.7        | 1040                           |

80% power and  $\alpha = 0.05$

From these calculations, we estimate that a study of 1,200 subjects (600 cases; 600 controls) will adequately detect significant associations of these magnitudes for potential risk factors of interest.



Queensland and Hunter New England sites will each enrol at least 250 cases into the study, while ACT will enrol at least 100 cases. Based on the previous Australian case-control study,<sup>27</sup> we expect approximately 80% of selected notified cases to be eligible and participate in the study (Table 2).

**Table 2. Sampling method for cases in each site**

| State                    | Expected number of notified cases during study period | Estimated cases from participating pathology laboratory | Culture +ve cases | Sequential sampling of notified cases | Total no. of cases | Expected no. to be recruited (~ 80% participation rate) |
|--------------------------|-------------------------------------------------------|---------------------------------------------------------|-------------------|---------------------------------------|--------------------|---------------------------------------------------------|
| QLD                      | 7000                                                  | 2800 (40%)                                              | 1260 (45% in QLD) | Select every 4 <sup>th</sup> case     | 315                | 250                                                     |
| ACT                      | 600                                                   | 130                                                     | 130               | Include all notified cases            | 130                | 100                                                     |
| NSW (Hunter New England) | ~1050                                                 | 313                                                     | 313               | Include all notified cases            | 313                | 250                                                     |
| <b>Total</b>             | <b>8650</b>                                           | <b>3243</b>                                             | <b>1703</b>       |                                       | <b>758</b>         | <b>600</b>                                              |

In Queensland, we will obtain cases from one private pathology provider reporting approximately 40% of the state's *Campylobacter* notifications. We estimate that this provider will notify 2,800 cases during the study period with an estimated 45% of these being culture-positive (1,260 notified cases). In ACT, approximately 600 *Campylobacter* notifications are expected during the study period; 130 are expected from the participating pathology laboratory. In Hunter New England, approximately 1,050 *Campylobacter* notifications are expected during the study period; 313 of these notifications will be from the participating pathology laboratory.

#### **Enrolment of Cases**

We will enrol all cases who meet the eligibility criteria (Table 3). Each site will check for new notifications of culture-positive *Campylobacter* infection daily, with only culture-positive *Campylobacter* cases eligible for this study. If a case refuses to participate in the study, we will select a subsequent case for inclusion. Enrolment of cases will depend on consent from the patient, or in the event of a child aged less than 18 years, consent from either one of the parents or the child's guardian. We will interview cases as soon as possible by telephone, preferably within two weeks of notification from the laboratory. It will be at the parent's or guardian's discretion as to whether a

child aged between 15 and 17 years is interviewed directly. The parent or guardian will be interviewed for cases aged less than 15 years.

**Table 3. Eligibility criteria for cases and controls**

| Criteria                                                                                                                                                          | Cases   | Controls                                  |
|-------------------------------------------------------------------------------------------------------------------------------------------------------------------|---------|-------------------------------------------|
| Had diarrhoea ( $\geq 3$ loose bowel movements in 24hrs)                                                                                                          | Include | Exclude                                   |
| Known date of illness onset                                                                                                                                       | Include | N/A                                       |
| Household members positive for <i>Campylobacter</i> in 4 weeks prior to onset of illness                                                                          | Exclude | Exclude (4 weeks prior to interview date) |
| Household members experiencing diarrhoea in 4 weeks prior to onset of illness                                                                                     | Exclude | Exclude (4 weeks prior to interview date) |
| Travelled outside of Australia in 2 weeks prior to onset of illness                                                                                               | Exclude | Exclude (2 weeks prior to interview date) |
| Travelled interstate for the entire 2 weeks prior to onset of illness                                                                                             | Exclude | Exclude (2 weeks prior to interview date) |
| Can't speak English                                                                                                                                               | Exclude | Exclude                                   |
| Not able to answer questions for some other reason (e.g. intellectually disabled)                                                                                 | Exclude | Exclude                                   |
| Not contactable after 6 telephone attempts                                                                                                                        | Exclude | Exclude                                   |
| Live outside the catchment areas                                                                                                                                  | Exclude | Exclude                                   |
| Do not have a telephone number available for their primary residence, or a mobile phone                                                                           | Exclude | Exclude                                   |
| An enteric pathogen other than <i>Campylobacter</i> was isolated/detected in their stool (excluding <i>Blastocystis hominis</i> and <i>Dientamoeba fragilis</i> ) | Exclude | N/A                                       |

#### DEFINITION AND SELECTION OF CONTROLS

We will recruit controls from notified cases of influenza, frequency matched by sex, age group and geographical area of residence by Statistical Area Level 4 (SA4). These controls will be selected with a delay of at least six months from their influenza infection to ensure that controls have returned to eating their customary diet.

1  
2  
3 Each participating site (QLD, ACT or HNE) will establish a database of controls (previous influenza  
4 cases). All cases of influenza notified to the health department in each site between 1<sup>st</sup> January and  
5 31<sup>st</sup> December 2017 will be entered into this control database. The age bands are 0-4 years, 5-14  
6 years, 15-34 years, 35-54 years, 55-74 years, and ≥75 years. An appropriate control will be randomly  
7 selected from the database within 30 days of interview of the notified case.  
8  
9

### 10 11 **Case and control recruitment**

12 Interviewers trained in computer-assisted telephone interviewing (CATI) will conduct telephone  
13 interviews. A maximum of six attempts will be made to contact any one case or control, with no  
14 more than three attempts in any one day. Three calls will be attempted between 9:00am and  
15 3:59pm, and three attempts between 4:00pm and 8:00pm. A text message will be sent to the  
16 potential participant after three failed call attempts, indicating that Public Health is trying to contact  
17 them. This protocol will be continued until the person is enrolled or excluded.  
18  
19

### 20 21 **QUESTIONNAIRES**

22 We will use specific case and control questionnaires for all participants (see Appendix 1). Cases will  
23 be asked additional questions about the clinical course of their illness and treatment. Interviewers  
24 will ask identical questions regarding exposures such as foods consumed, dining locations, water  
25 sources, domestic food handling techniques and exposure to animals of cases and controls.  
26 Questions on foods consumed, dining locations, water consumed, animal and pet exposures will be  
27 asked based on a seven-day history. Questions on international travel will be asked based on a two-  
28 week history. Antibiotic and antacid consumption, immunosuppressive treatment and household  
29 history of diarrhoea will be based on a four-week history. Questions on food handling and general  
30 kitchen practices will be based on usual practices rather than recent history. Demographic  
31 information will be collected from cases and controls. Contact information required to conduct  
32 interviews will be stored in a password-protected Excel document with only those needing to  
33 contact individuals given access. Piloted questionnaires were modified to remove repetitions,  
34 improve clarity, and to ensure that interviews could be conducted within 20 minutes.  
35  
36

### 37 38 **DATA HANDLING & RISK FACTOR ANALYSIS**

39 We will undertake descriptive reporting of campylobacteriosis incidence by person, place and time.  
40 We will also describe the severity of symptoms, treatment, and burden of illness.  
41  
42

43 Risk factor analysis will involve the examination of two-by-two contingency tables with chi square or  
44 exact tests to determine the presence of univariable associations between variables and disease. To  
45 measure the strength of an association, we will estimate odds ratios and calculate 95% confidence  
46  
47  
48  
49  
50  
51  
52  
53  
54  
55  
56  
57  
58  
59  
60

intervals in a univariable analysis, followed by multivariable logistic regression modelling to adjust for potential confounders. Risk factors selected for inclusion in the regression model will include age, season and geographic area, variables with a significant univariable association with disease, and variables with a P-value  $\leq 0.25$  that are biologically plausible and of interest to the research team.

## LABORATORY ANALYSES

### Human samples

As outlined in Table 2, it is expected that 250 human isolates from Hunter New England, 250 from Queensland, 100 from Victoria and 100 from ACT will be sequenced. The initial isolation and confirmation of *Campylobacter* infection will be performed locally in each State/Territory. Only samples with a pure and viable culture will undergo WGS.

### Animal and food samples

We will collect samples from chicken meat (covering the two production methods of continually housed and free range/housed), beef, lamb, pork, and from pet dogs. Given low prevalence of *Campylobacter* in meats other than chicken, samples will be collected from offal (preferably liver) from bovine, ovine and porcine sources to ensure sufficient positive samples are obtained for the study. Given the rising importance of chicken liver pate as a source of outbreaks in Australia,<sup>28</sup> chicken offal will also be sampled. Sample sizes by source are based on data from two states to ensure 50 positive samples per food source, and 30 samples in companion animals (Table 4). We will also contact veterinary clinics and teaching hospitals to ensure sufficient *Campylobacter*-positive samples from dogs. Water samples have been omitted from the genomic aspect of this study due to logistical constraints in sampling untreated water sources across the large geographical area involved in this study, and the complexity of designing an appropriate sampling frame. As there is a lack of evidence implicating municipal drinking water as sources of *Campylobacter* infection in Australia<sup>1 27</sup> we excluded water sampling from this study.

**Table 4. Sampling to ensure 50 isolates per food source and 30 isolates from companion animals**

|                    | Foods              |            |       |       |       |       | Animals |             |
|--------------------|--------------------|------------|-------|-------|-------|-------|---------|-------------|
|                    | Chicken            |            |       | Beef  | Lamb  | Pork  | Dogs    | Total       |
|                    | Continually housed | Free-range | Offal | Offal | Offal | Offal |         |             |
| Assumed prevalence | 0.7                | 0.7        | 0.7   | 0.14  | 0.6   | 0.22  | 0.2     |             |
| Samples required   | 72                 | 72         | 72    | 286   | 100   | 272   | 150     | <b>1041</b> |
| Positive isolates  | 50                 | 50         | 50    | 40    | 60    | 60    | 30      | <b>330</b>  |

1  
2  
3  
4  
5 The initial isolation and confirmation of *Campylobacter* will be performed locally at laboratories in  
6 each State/Territory, with isolates forwarded to the Microbiological Diagnostic Unit Public Health  
7 Laboratory for WGS, except Queensland isolates which will be sequenced at Queensland Health. To  
8 detect seasonal and temporal variation in *Campylobacter* genetic types, 1041 non-human samples  
9 (estimated to produce 330 *Campylobacter* isolates) will be collected over a period of one year in  
10 Queensland, and two years in New South Wales. To assess latitudinal variation in chicken meat  
11 samples across eastern Australia, 105 chicken samples (70 chicken meat and 35 chicken offal) will be  
12 collected over a six-month period in Victoria. Food samples will be collected monthly from retail  
13 premises, using protocols from surveys undertaken in 2014 by partner organisations, with a pilot of  
14 30 isolates in Queensland.

15  
16 We will also collect an additional 20-30 human isolates from four additional Australian jurisdictions  
17 not participating in this case-control study to undergo WGS. This will be done over a two-month  
18 period that overlaps with the case-control study sample collection, and is planned to help inform the  
19 generalisability of the case-control study.

#### 20 21 22 23 24 25 26 27 28 **SEQUENCING AND SEQUENCE DATA PROCESSING**

29  
30 *Campylobacter* isolates selected for sequencing will be repurified on solid medium and a single  
31 colony selected for preparation of genomic DNA. A sequencing library will be prepared from the  
32 genomic DNA for sequencing on the Illumina sequencing platform (MiSeq or NextSeq). A sample of  
33 the selected colony will be regrown and cryopreserved (resuspended in liquid medium  
34 supplemented with 10% Glycerol and stored at -80°C). In some cases, *Campylobacter* enrichment  
35 cultures will be cryopreserved to enable future investigation of the genetic diversity of  
36 *Campylobacters* present. The short-read, paired end dataset produced by the Illumina Instrument  
37 from the genomic DNA of each isolate will be processed to produce a draft genome sequence for the  
38 isolate using a *de novo* assembler such as MEGAHIT.<sup>29</sup> The draft genome sequence will be annotated  
39 using Prokka.<sup>30</sup> We will use the draft genome sequence to perform the initial sub-species  
40 classification by deriving a multilocus sequence type (MLST) using the "*Campylobacter jejuni/coli*"  
41 typing scheme (pubmlst.org). Again, using the draft genome sequence, further typing e.g. virulence  
42 factors (<http://www.mgc.ac.cn/VFs/>) or antimicrobial resistance genotype  
43 (<https://cge.cbs.dtu.dk/services/ResFinder/>) will be performed using Abricate  
44 (<https://github.com/tseemann/abricate>). We will perform comparative genomics to examine the  
45 genetic relationships between selected subgroups of isolates in more detail using Nullarbor  
46 (<https://github.com/tseemann/nullarbor>).

## SOURCE ATTRIBUTION MODELLING

We will analyse the epidemiological data within designated MLST groups or other typing groups derived from the genomic sequence data. Source attribution modelling and source-assigned analyses will be conducted.

Source attribution models combine typing data from isolates from food, animal and humans to estimate the proportion of human infections that can be attributed to animal and food reservoirs.<sup>31</sup>

<sup>32</sup> Once inferred MLSTs have been ascertained, the proportional similarity index<sup>25</sup> will be used to assess similarities by source. We will then undertake source attribution analyses by adapting the asymmetric island model which has previously been applied to MLST data<sup>25 33</sup> using Markov Chain Monte Carlo (MCMC) methods<sup>34</sup> implemented using the free software WinBUGS.<sup>35</sup> These methods will first be applied to MLST data extracted from whole genome sequences (the aforementioned “inferred MLSTs”), and then compared to structured phylogenetic modelling approaches<sup>36 37</sup> that provide scope to infer inter-host transmission.

We will then group cases according to putative source based on these source attribution methods.<sup>38</sup> For example, all isolates attributed to chicken will be grouped together, regardless of differing strains. These cases attributed to chicken will then be compared to all controls in a risk factor analysis to produce a source-assigned analysis.

## SPATIAL CLUSTERS AND TEMPORAL TRENDS

We will use newly-designated WGS-based MLSTs to assess heterogeneity in isolates from food sources and companion animals in Queensland and New South Wales, and in isolates from chicken meat and humans across Queensland, New South Wales, Victoria and ACT. A two-year sampling framework in New South Wales, one year of sampling in Queensland, and previous survey work in these states will allow us to assess the extent of seasonal and temporal trends. Postcode-level data associated with human illnesses will be used to detect space-time clusters using a scan statistic implemented in the free software SaTScan, at the Statistical Area 1 level.<sup>39</sup> We will use a retrospective space-time permutation model to detect high risk clusters by comparing the observed number of illnesses to the expected number in that geographic zone and time-period.<sup>40</sup>

## STUDY LINKAGES AND COLLABORATIONS

The CampySource Project Team comprises three working groups and a reference panel. The working groups focus on: food and animal sampling, epidemiology and modelling, and genomics. The reference panel includes expert representatives from government and industry.

1  
2  
3 The study is supported by the following partner organisations: the Australian National University,  
4 Massey University, University of Melbourne, Queensland Health, Queensland Health Forensic and  
5 Scientific Services, New South Wales Health, Hunter New England Health, Victorian Department of  
6 Health and Human Services, Food Standards Australia New Zealand, Commonwealth Department of  
7 Health and AgriFutures Australia – Chicken Meat Program.  
8  
9

10  
11 CampySource is also supported by collaboration with the following organisations: ACT Health,  
12 Sullivan Nicolaidis Pathology, University of Queensland, Primary Industries and Regions South  
13 Australia, Department of Health and Human Services Tasmania, Meat and Livestock Australia, and  
14 New Zealand Ministry for Primary Industries.  
15  
16

### 17 18 **ACKNOWLEDGEMENTS**

19  
20 The CampySource Project Team consists of: Nigel P. French, Massey University, New Zealand; Mary  
21 Valcanis, The University of Melbourne; Dieter Bulach, The University of Melbourne; Emily Fearnley,  
22 The Australian National University; Russell Stafford, Queensland Health; John Bates, Queensland  
23 Health; Trudy Graham, Queensland Health; Keira Glasgow, Health Protection NSW; Kirsty Hope,  
24 Health Protection NSW; Arie H. Havelaar, The University of Florida, USA; Joy Gregory, Department of  
25 Health and Human Services, Victoria; James Flint, Hunter New England Health; Simon Firestone, The  
26 University of Melbourne; James Conlan, Food Standards Australia New Zealand; James J. Smith,  
27 Queensland Health; Sally Symes, Department of Health and Human Services, Victoria; Barbara  
28 Butow, Food Standards Australia New Zealand; Liana Varrone, The University of Queensland; Linda  
29 Selvey, The University of Queensland; Deborah Denehy, ACT Health; Radomir Krsteski, ACT Health;  
30 Natasha Waters, ACT Health; Kim Lilly, Hunter New England Health; Julie Collins, Hunter New  
31 England Health; Tony Merritt, Hunter New England Health; Joanne Barfield, Hunter New England  
32 Health; Ben Howden, The University of Melbourne; Kylie Hewson, AgriFutures Australia – Chicken  
33 Meat Program; Laura Ford, The Australian National University; Liz Walker, The Australian National  
34 University; Cameron Moffatt, The Australian National University; Martyn Kirk, The Australian  
35 National University; and Kathryn Glass, The Australian National University.  
36  
37  
38  
39  
40  
41  
42  
43  
44

45 While undertaking studies, LV is supported through an Australian Government Research Training  
46 Program (RTP) Scholarship.  
47  
48

### 49 50 **DECLARATIONS**

#### 51 **Ethics approval and consent to participate**

52 Informed Consent

53  
54 A suitably trained interviewer will inform potential participants about the purpose, methods and  
55 demands of the study. We will obtain verbal consent from all study participants or their guardians.  
56  
57  
58

1  
2  
3 Persons aged 18 years and older will be interviewed following informed consent. It will be at the  
4 parent's or guardian's discretion as to whether a child aged between 15 and 18 years is interviewed  
5 directly, following informed parental/guardian consent. Parents/guardians will be interviewed for  
6 cases aged less than 15 years, after informed consent is obtained.  
7  
8

#### 9 Confidentiality

10 All information and identifiers will be kept confidential. Names and personal identifiers will be  
11 collected and entered into computer records but will be password protected. No personal identifiers  
12 will be included in any published materials relating to this study. All hard copy questionnaires  
13 containing patient identifiers will be stored in locked filing cabinets in a secure location to which only  
14 study investigators and interviewers will have access.  
15  
16  
17  
18

#### 19 Risks and Benefits

20 Participants will be informed there are no individual benefits associated with the study and that  
21 participation is voluntary. Failure to participate or a withdrawal of participation will not affect any  
22 future treatment. There is also no risk to the patient, and the only cost is time spent – approximately  
23 20 minutes – being interviewed. They may refuse to answer any of the questions or stop at any time.  
24  
25  
26  
27

#### 28 Animal Ethics

29 All procedures involving live animals will be performed in accordance with a protocol approved by  
30 the University of Melbourne's Animal Ethics Committee (ethics ID: 1714156).  
31  
32  
33

#### 34 Consent for publication

35 Not applicable.  
36  
37

#### 38 **Availability of data and materials**

39 The Illumina read sets produced as part of this study will be published at INSDC (Sequence Read  
40 Archive (DDJB/NCBI) or the European Nucleotide Archive (EMBL-EBI))  
41

#### 42 **Competing interests**

43 No authors have any competing interests to declare.  
44  
45

#### 46 **Funding**

47 This CampySource project was supported by an NHMRC partnership grant 1116294 and  
48 contributions from Queensland Health, Food Standards Australia New Zealand, AgriFutures Australia  
49 – Chicken Meat Program, Commonwealth Department of Health, and New South Wales Department  
50 of Primary Industries.  
51  
52  
53

54 MDK is supported by a National Health and Medical Research Council Fellowship (GNT1145997).  
55  
56  
57  
58  
59  
60



### Author contributions

MDK conceived the original idea for this study. All authors contributed to the study design and analysis plan. LV and RJS wrote the first draft with contributions from all authors. LV, RJS, LS, MDK and KG were involved in multiple revisions. The final version of the manuscript was approved by all authors.

### REFERENCES

1. The OzFoodNet Working Group. Monitoring the incidence and causes of diseases potentially transmitted by food in Australia: Annual report of the OzFoodNet network, 2011. *Annual Report* 2011; 39(2). [http://www.health.gov.au/internet/main/publishing.nsf/Content/cda-cdi3902-pdf-cnt.htm/\\$FILE/cdi3902g.pdf](http://www.health.gov.au/internet/main/publishing.nsf/Content/cda-cdi3902-pdf-cnt.htm/$FILE/cdi3902g.pdf).
2. Kaakoush NO, Castaño-Rodríguez N, Mitchell HM, et al. Global Epidemiology of Campylobacter Infection. *Clin Microbiol Rev* 2015;28(3):687-720. doi: 10.1128/cmr.00006-15
3. Ford L, Kirk MD, Glass K, et al. Sequelae of Foodborne Illness Caused by 5 Pathogens, Australia, Circa 2010. *Emerg Infect Dis* 2014;20(11):1865. doi: 10.3201/eid2011.131316
4. Fernandes AM, Balasegaram S, Willis C, et al. Partial Failure of Milk Pasteurization as a Risk for the Transmission of Campylobacter From Cattle to Humans. *Clin Infect Dis* 2015;61(6):903-09. doi: 10.1093/cid/civ431
5. Commonwealth of Australia. National Notifiable Diseases Surveillance System, 2018.
6. Hall G, Yohannes K, Raupach J, et al. Estimating Community Incidence of Salmonella, Campylobacter, and Shiga Toxin-producing Escherichia coli Infections, Australia. *Emerg Infect Dis* 2008;14(10):1601-09. doi: 10.3201/eid1410.071042
7. The Institute of Environmental Science and Research Ltd. Notifiable Diseases in New Zealand: Annual Report 2014. Porirua, New Zealand, 2015.
8. Cressey P, Lake R. Estimated incidence of foodborne illness in New Zealand: application of overseas models and multipliers, 2011.
9. Lastovica AJ, Allos BM. Clinical Significance of Campylobacter and Related Species Other Than Campylobacter jejuni and Campylobacter coli. In: Nachamkin I, Szymanski CM, Blaser MJ, eds. Campylobacter, Third Edition: American Society of Microbiology 2008.
10. Fricker CR, Park RWA. A two-year study of the distribution of 'thermophilic' campylobacters in human, environmental and food samples from the Reading area with particular reference to toxin production and heat-stable serotype. *J Appl Bacteriol* 1989;67(6):477-90. doi: 10.1111/j.1365-2672.1989.tb02530.x
11. Blaser MJ, Taylor DN, Feldman RA. Epidemiology of Campylobacter jejuni Infections. *Epidemiol Rev* 1983;5(1):157-76.
12. Stern NJ, Hernandez MP, Blankenship L, et al. Prevalence and Distribution of Campylobacter jejuni and Campylobacter coli in Retail Meats. *J Food Prot* 1985;48(7):595-99.
13. Wood RC, MacDonald KL, Osterholm MT. Campylobacter enteritis outbreaks associated with drinking raw milk during youth activities: A 10-year review of outbreaks in the United States. *JAMA* 1992;268(22):3228-30. doi: 10.1001/jama.1992.03490220072031
14. Vally H, Glass K, Ford L, et al. Proportion of illness acquired by foodborne transmission for nine enteric pathogens in Australia: an expert elicitation. *Foodborne Pathog Dis* 2014;11(9):727-33. doi: 10.1089/fpd.2014.1746
15. Kirk M, Ford L, Glass K, et al. Foodborne illness, Australia, circa 2000 and circa 2010. *Emerg Infect Dis* 2014;20(11):1857-64. doi: 10.3201/eid2011.131315
16. Heymann DL, editor. *Control of Communicable Diseases Manual*. 19th ed. Maryland: United Book Press, Inc., 2008.
17. Pebody RG, Ryan MJ, Wall PG. Outbreaks of campylobacter infection: rare events for a common pathogen. *Commun Dis Rep CDR Rev* 1997;7(3):R33-7. [published Online First: 1997/03/07]

18. Tauxe Robert V, Hargrett-Bean N, Patton CM. Campylobacter Isolates in the United States, 1982-1986. *MMWR Surveill Summ* 1988;37(S S-2):1-13.
19. Sammarco ML, Ripabelli G, Fanelli I, et al. Prevalence and Biomolecular Characterization of Campylobacter spp. Isolated from Retail Meat. *J Food Prot* 2010;73(4):720-28.
20. Whyte P, McGill K, Cowley D, et al. Occurrence of Campylobacter in retail foods in Ireland. *Int J Food Microbiol* 2004;95(2):111-18. doi: 10.1016/j.ijfoodmicro.2003.10.018
21. Wong TL, Hollis L, Cornelius A, et al. Prevalence, Numbers, and Subtypes of Campylobacter jejuni and Campylobacter coli in Uncooked Retail Meat Samples. *J Food Prot* 2007;70(3):566-73.
22. Noormohamed A, Fakhr MK. A Higher Prevalence Rate of Campylobacter in Retail Beef Livers Compared to Other Beef and Pork Meat Cuts. *Int J Environ Res Public Health* 2013;10(5):2058.
23. Samuel M, Reilly K, Shallow S, et al. Burden of Campylobacter infection in the United States and declining trend in California, FoodNet 1996-1998. International Conference on Abstract Emerging Infectious Diseases. Atlanta, GA, 2000.
24. French NP, Marshall JC, the Molecular Epidemiology and Public Health Laboratory. Source Attribution Studies for Campylobacteriosis in New Zealand: Massey University, 2014.
25. Müllner P, Spencer SEF, Wilson DJ, et al. Assigning the source of human campylobacteriosis in New Zealand: A comparative genetic and epidemiological approach. *Infect Genet Evol* 2009;9(6):1311-19. doi: 10.1016/j.meegid.2009.09.003
26. Eastwood K, Durrheim DN, Merritt TD, et al. Field exercises are useful for improving public health emergency responses. *Western Pac Surveill Response J* 2010;1(1):12-18. doi: 10.5365/wpsar.2010.1.1.003
27. Stafford Russell J, Schluter PJ, Kirk MD, et al. A multi-centre prospective case-control study of campylobacter infection in persons aged 5 years and older in Australia. *Epidemiol Infect* 2007;135(6):978-88. doi: 10.1017/S0950268806007576
28. Merritt TD, Combs B, Pingault N. Campylobacter outbreaks associated with poultry liver dishes. *Commun Dis Intell Q Rep* 2011;35(4):299-300.
29. Li D, Liu C-M, Luo R, et al. MEGAHIT: an ultra-fast single-node solution for large and complex metagenomics assembly via succinct de Bruijn graph. *Bioinformatics (Oxford, England)* 2015;31(10):1674-6. doi: 10.1093/bioinformatics/btv033 [published Online First: 2015/01/23]
30. Seemann T. Prokka: rapid prokaryotic genome annotation. *Bioinformatics (Oxford, England)* 2014;30(14):2068-9. doi: 10.1093/bioinformatics/btu153 [published Online First: 2014/03/20]
31. Glass K, Fearnley E, Hocking H, et al. Bayesian Source Attribution of Salmonellosis in South Australia. *Risk Anal* 2016;36(3):561-70. doi: 10.1111/risa.12444
32. Hald T, Vose D, Wegener HC, et al. A Bayesian Approach to Quantify the Contribution of Animal-Food Sources to Human Salmonellosis. *Risk Anal* 2004;24(1):255-69. doi: 10.1111/j.0272-4332.2004.00427.x
33. Sears A, Baker MG, Wilson N, et al. Marked Campylobacteriosis Decline after Interventions Aimed at Poultry, New Zealand. *Emerg Infect Dis* 2011;17(6):1007. doi: 10.3201/eid1706.101272
34. Müllner P, Jones G, Noble A, et al. Source attribution of food-borne zoonoses in New Zealand: a modified Hald model. *Risk Anal* 2009;29(7):970-84. doi: 10.1111/j.1539-6924.2009.01224.x
35. Lunn DJ, Thomas A, Best N, et al. WinBUGS - A Bayesian modelling framework: Concepts, structure, and extensibility. *Stat Comput* 2000;10(4):325-37. doi: 10.1023/a:1008929526011
36. Dearlove BL, Cody AJ, Pascoe B, et al. Rapid host switching in generalist Campylobacter strains erodes the signal for tracing human infections. *ISME J* 2015;10:721. doi: 10.1038/ismej.2015.149

- 1  
2  
3 37. Mather AE, Vaughan TG, French NP. Molecular Approaches to Understanding Transmission and  
4 Source Attribution in Nontyphoidal Salmonella and Their Application in Africa. *Clin Infect Dis*  
5 2015;61(suppl\_4):S259-S65. doi: 10.1093/cid/civ727  
6 38. Mughini Gras L, Smid JH, Wagenaar JA, et al. Risk Factors for Campylobacteriosis of Chicken,  
7 Ruminant, and Environmental Origin: A Combined Case-Control and Source Attribution  
8 Analysis. *PLoS One* 2012;7(8):e42599. doi: 10.1371/journal.pone.0042599  
9 39. Kulldorff M, Heffernan R, Hartman J, et al. A Space–Time Permutation Scan Statistic for Disease  
10 Outbreak Detection. *PLoS Med* 2005;2(3):e59. doi: 10.1371/journal.pmed.0020059  
11 40. Touray K, Adetifa IM, Jallow A, et al. Spatial analysis of tuberculosis in an Urban West African  
12 setting: is there evidence of clustering? *Trop Med Int Health* 2010;15(6):664-72. doi:  
13 10.1111/j.1365-3156.2010.02533.x  
14  
15  
16  
17  
18  
19  
20  
21  
22  
23  
24  
25  
26  
27  
28  
29  
30  
31  
32  
33  
34  
35  
36  
37  
38  
39  
40  
41  
42  
43  
44  
45  
46  
47  
48  
49  
50  
51  
52  
53  
54  
55  
56  
57  
58  
59  
60

For peer review only

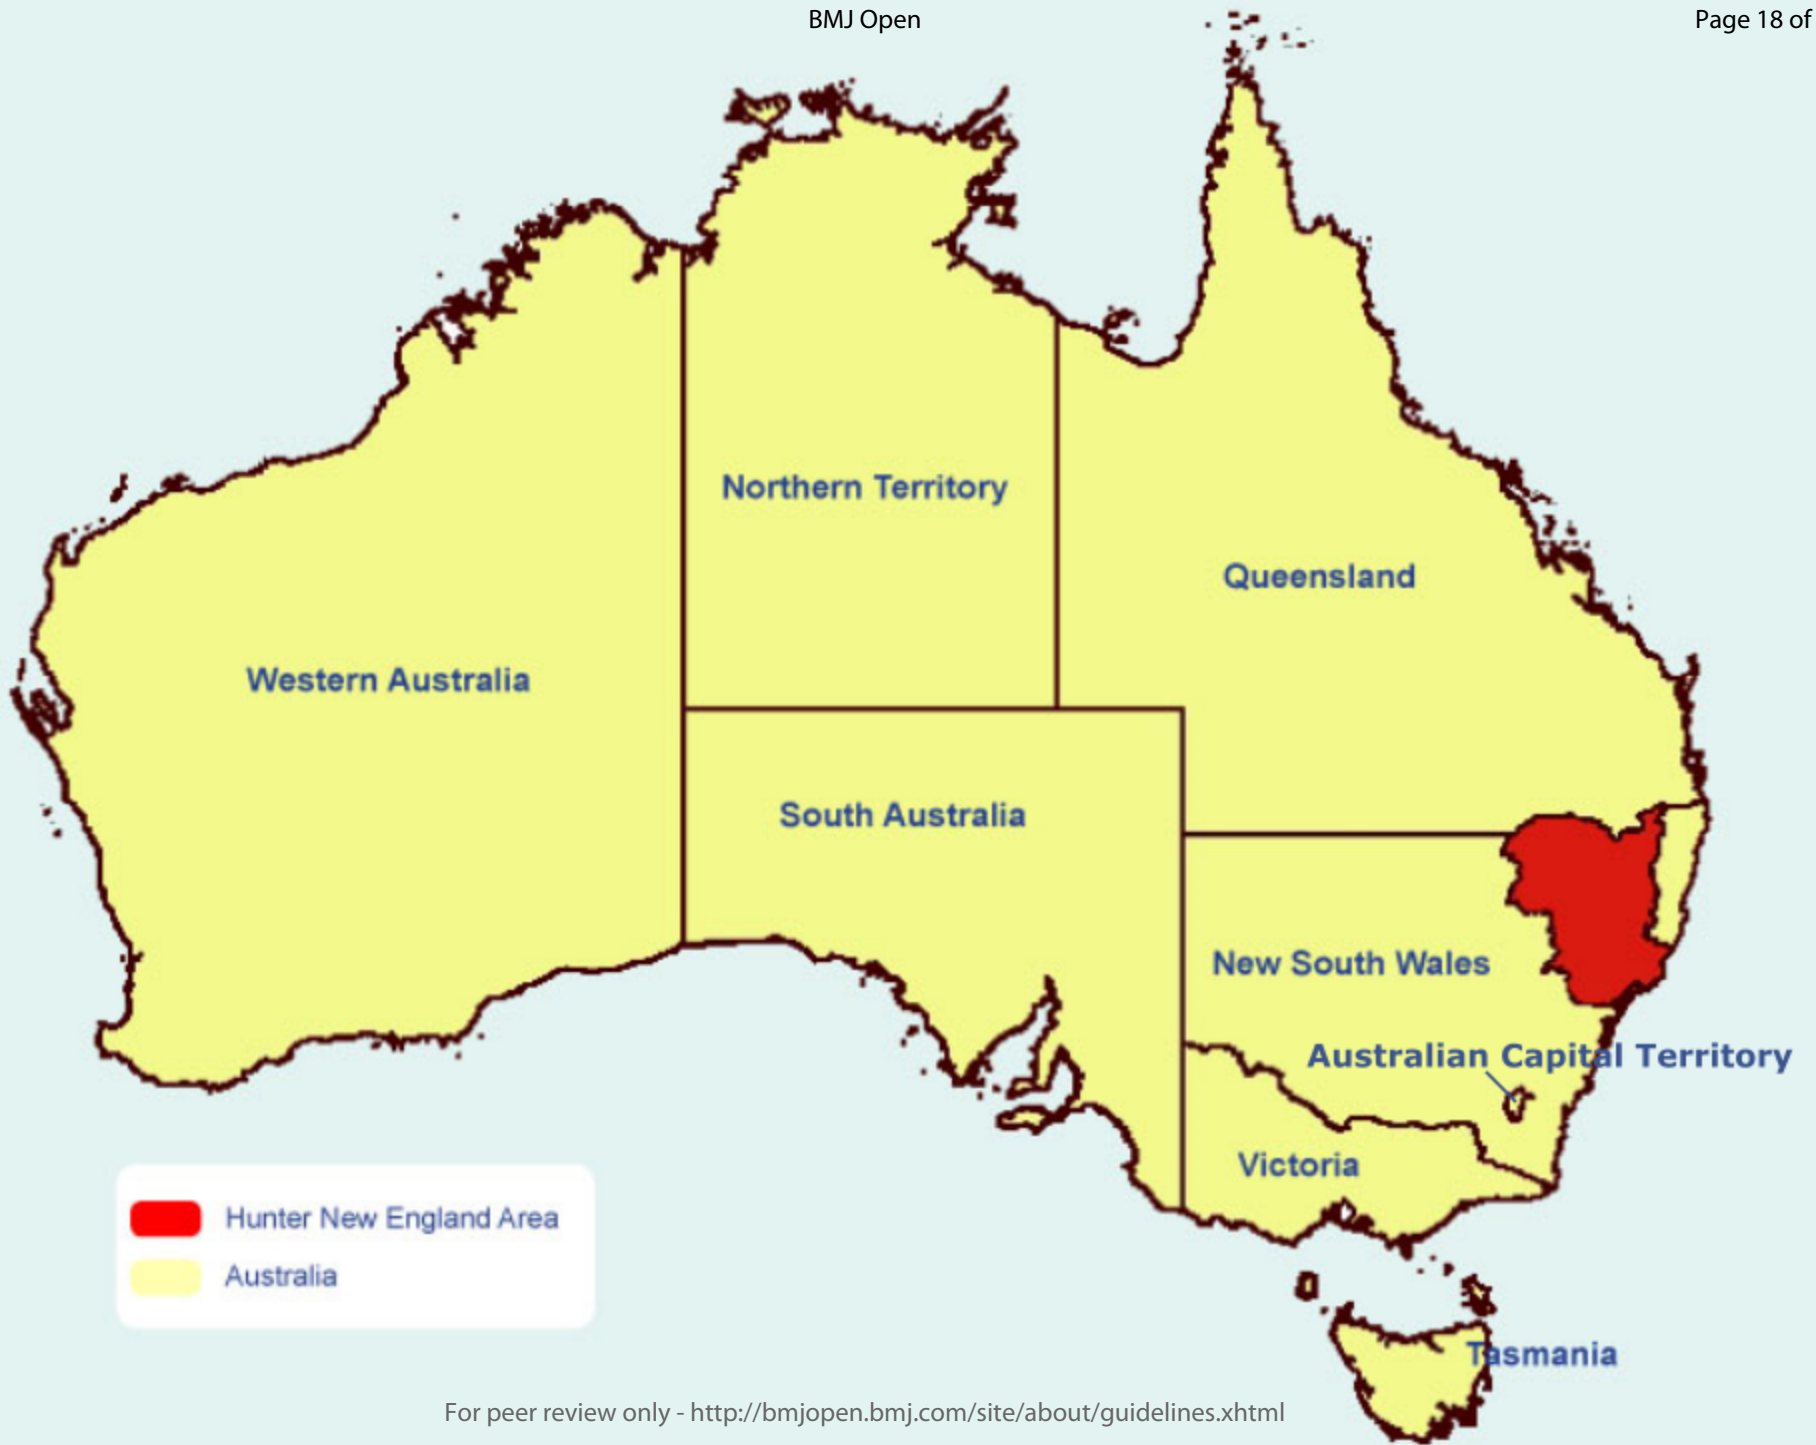

1  
2  
3  
4  
5  
6  
7  
8  
9  
10  
11  
12  
13  
14  
15  
16  
17  
18  
19  
20  
21  
22  
23  
24  
25  
26  
27  
28  
29  
30  
31  
32  
33  
34  
35  
36  
37  
38  
39  
40  
41  
42  
43  
44

1  
2  
3  
4  
5  
6  
7  
8  
9  
10  
11  
12  
13  
14  
15  
16  
17  
18  
19  
20  
21  
22  
23  
24  
25  
26  
27  
28  
29  
30  
31  
32  
33  
34  
35  
36  
37  
38  
39  
40  
41  
42  
43  
44  
45  
46  
47  
48  
49  
50  
51  
52  
53  
54  
55  
56  
57  
58  
59  
60

---

|            |                          |
|------------|--------------------------|
| Refusal    | <input type="checkbox"/> |
| Ineligible | <input type="checkbox"/> |

---

|           |                                                                                                                                                                                                         |
|-----------|---------------------------------------------------------------------------------------------------------------------------------------------------------------------------------------------------------|
| ID Number | <input type="checkbox"/> |
|-----------|---------------------------------------------------------------------------------------------------------------------------------------------------------------------------------------------------------|

---

|                      |                                                                                                                                                                                                         |
|----------------------|---------------------------------------------------------------------------------------------------------------------------------------------------------------------------------------------------------|
| Interview Date       | <input type="checkbox"/> |
| Interview Start Time | _____                                                                                                                                                                                                   |

---

|              |                                                                                                                                                                                                         |
|--------------|---------------------------------------------------------------------------------------------------------------------------------------------------------------------------------------------------------|
| Data entered | <input type="checkbox"/>                                                                                                                                                                                |
| Date         | <input type="checkbox"/> |
| Data checked | <input type="checkbox"/>                                                                                                                                                                                |
| Date         | <input type="checkbox"/> |

---

# Source Attribution of *Campylobacter* in Australia Study

## Case Questionnaire

## INTRODUCTION

**Interviewer Note:** If case is less than 15 years of age you will need to speak to parent or guardian most familiar with the eating habits of the child.

If case is aged between 15–17 years you will need to obtain parent or guardian consent prior to interview.

Please note that for subjects under the age of 15 years, questions relate to the case, not the person being interviewed unless specified in the body of the questionnaire.

**“Hello, my name is <Interviewers Name> and I am calling on behalf of [Queensland Health / ACT Health / Hunter New England Public Health Unit].”**

**“May I please speak with <name of case> or <name of case’s mother/father>?”**

**Interviewer Note:** When the case comes to the phone then repeat the introduction and proceed with the explanatory statement.

If the case is unavailable then arrange an alternative time for the interview

**“The Australian National University in conjunction with the [state health department] is conducting a study of *Campylobacter* infection in Australia to identify possible causes. *Campylobacter* infections are notifiable to health departments in each state and territory throughout Australia. We understand that you recently experienced an illness due to the *Campylobacter* bacteria. We would like to find out more about your *Campylobacter* illness. Your participation is voluntary, all responses are confidential and if there are any questions you do not wish to answer, just say so.”**

**“Would you be prepared to answer some questions about your illness and activities prior to your illness? The questions will take approximately 20 minutes.”** Yes • No •

**“In this study, we will collect information on foods you ate and activities you undertook prior to your illness. Your participation is voluntary and you can stop at any time. No individual information will be presented in any reports or presentations. Partners in this research project will comply with the Australian Privacy Act 1988. An information sheet about this research project is available on the ANU website.**

**“Would you like me to send you a copy or provide you with the link?”** Yes • No •

**If yes, “Could you give me an address/email?”** \_\_\_\_\_

**“This study has been approved by the Australian National University Ethics Committee (Protocol 2016/426). If you have any concerns please direct them to Human Research Ethics Committee Research Services Office, Chancellery 10B The Australian National University, ACT 2601 Tel: 6125 7945 Fax: 6125 4807 Email: Human.Ethics.Officer@anu.edu.au”**

**“Do you have any further questions about the project?”** Yes • No •

**Do you agree to participate in the project?** Yes • No •

**“Do you have the time right now to answer these questions?”**

**If NO, arrange an alternative time to phone back to conduct the interview**

**If YES, continue**

## 1. ELIGIBILITY QUESTIONS

“Because I will be asking about specific dates around the time of your illness, it may be helpful for you to have a calendar or diary in front of you. Do you need a few minutes to get these?”

- Yes, I will get one no.....
- No, I already have one with me.....
- Don't have access to a calendar .....

The first few questions we'll be asking you are about some symptoms that are associated with [your/their] illness.

1. For the purposes of this study, we define diarrhoea as 3 or more loose stools or bowel movements in any 24-hour period. When you had your *Campylobacter* infection, did you have diarrhoea?

- Yes .....  1 **Go to Q2**
- No .....  2 **Check ineligible box then END INTERVIEW**
- Don't know/Not sure .....  7 **Check ineligible box then END INTERVIEW**

- 1a During this diarrhoeal illness, what was the maximum number of stools or bowel movements you had in any 24 hour period?

- 0-2 .....  1 **Check ineligible box then END INTERVIEW**  
(If response = '0-2', then recode Q.1 as = '2')
- 3-5 .....  2
- 6-10.....  3
- 11-20.....  4
- More than 20.....  5
- Don't know/Not sure .....  7

2. For how many days did your diarrhoea last? **DAYS**

Don't know/Not sure .....  77

### CALCULATE PRIOR TO INTERVIEW

Date stool specimen collected

|                      |                      |                      |                      |                      |                      |
|----------------------|----------------------|----------------------|----------------------|----------------------|----------------------|
| <input type="text"/> |
| Day                  |                      | Month                |                      | Year                 |                      |

3. Could you please let me know what the date was when your diarrhoea began?

|                      |                      |                      |
|----------------------|----------------------|----------------------|
| <input type="text"/> | <input type="text"/> | <input type="text"/> |
| Day                  | Month                | Year                 |

(If person is unsure of date then prompt with date of stool specimen)

- Don't know/Not sure .....  7 **Check ineligible box then END INTERVIEW**

I will now just enter a couple of other dates that we will be talking about throughout the interview. I won't be a moment....

**Interviewer Note:** Refer to your calendar to determine the interval from DATE 4 WEEKS BEFORE DIARRHOEA BEGAN to DATE 1 DAY BEFORE DIARRHOEA BEGAN.

1  
2  
3  
4  
5  
6  
7  
8  
9

4. **In the 4 weeks before your illness began, that is from <DATE 4 WEEKS BEFORE DIARRHOEA> through <DATE 1 DAY BEFORE DIARRHOEA BEGAN>, did anyone else in your household test positive for *Campylobacter*?**

Yes.....  1 **Check ineligible box then END INTERVIEW**  
 No .....  2  
 Don't know/Not sure .....  7

10  
11  
12  
13  
14  
15  
16  
17  
18

5. **In the 4 weeks before your illness began, that is from <DATE 4 WEEKS BEFORE DIARRHOEA> through <DATE 1 DAY BEFORE DIARRHOEA BEGAN>, did anyone else in your household have diarrhoea?**

Yes .....  1 **Check ineligible box then END INTERVIEW**  
 No .....  2  
 Don't know/Not sure .....  7

19  
20  
21  
22  
23

|                          |                                                                                                                                 |
|--------------------------|---------------------------------------------------------------------------------------------------------------------------------|
| <b>Interviewer Note:</b> | Refer to your calendar to determine the interval from DATE 2 WEEKS BEFORE DIARRHOEA BEGAN to DATE 1 DAY BEFORE DIARRHOEA BEGAN. |
|--------------------------|---------------------------------------------------------------------------------------------------------------------------------|

24  
25  
26  
27  
28  
29  
30  
31  
32  
33  
34  
35  
36  
37  
38  
39  
40  
41  
42  
43  
44  
45  
46  
47  
48  
49  
50  
51  
52  
53  
54  
55  
56  
57  
58  
59  
60

6. **In the 2 weeks before your illness began, that is from <DATE 2 WEEKS BEFORE DIARRHOEA> through <DATE 1 DAY BEFORE DIARRHOEA BEGAN>, did you travel overseas or interstate?**

INTERVIEWER NOTE:  
 IF participant answers "yes",  
 1. Clarify if the travel was overseas or interstate  
 2. If travel was interstate:  
 Clarify the length of time spent interstate in the time period just mentioned

Options to select:  
 A. If the participant has travelled overseas or spent the whole two weeks interstate: (Select option Yes)  
 B. If the participant has travelled interstate only for a portion of the time: (Select option No)

Yes.....  1 **Check ineligible box then END INTERVIEW**  
 No.....  2  
 Don't know/Not sure.....  7



## 2. HEALTH QUESTIONS

### 7. During this illness, did you have any of the following symptoms?

|                             | Yes                        | No                         | DK/NS                      |
|-----------------------------|----------------------------|----------------------------|----------------------------|
| a. Fever.....               | <input type="checkbox"/> 1 | <input type="checkbox"/> 2 | <input type="checkbox"/> 7 |
| b. Vomiting.....            | <input type="checkbox"/> 1 | <input type="checkbox"/> 2 | <input type="checkbox"/> 7 |
| c. Stomach cramps.....      | <input type="checkbox"/> 1 | <input type="checkbox"/> 2 | <input type="checkbox"/> 7 |
| d. Blood in your stool..... | <input type="checkbox"/> 1 | <input type="checkbox"/> 2 | <input type="checkbox"/> 7 |
| e. Nausea.....              | <input type="checkbox"/> 1 | <input type="checkbox"/> 2 | <input type="checkbox"/> 7 |
| f. Headache.....            | <input type="checkbox"/> 1 | <input type="checkbox"/> 2 | <input type="checkbox"/> 7 |
| g. Muscle/body aches.....   | <input type="checkbox"/> 1 | <input type="checkbox"/> 2 | <input type="checkbox"/> 7 |

### 8. Did you take any antibiotics as a result of this illness?

|                          |                            |                    |
|--------------------------|----------------------------|--------------------|
| Yes.....                 | <input type="checkbox"/> 1 |                    |
| No.....                  | <input type="checkbox"/> 2 | <b>Go to Q. 10</b> |
| Don't know/Not sure..... | <input type="checkbox"/> 7 | <b>Go to Q. 10</b> |

### 9. What antibiotic(s) were you taking? [Ask person to get tablet bottle, if possible]

|                                                     |                          |                |
|-----------------------------------------------------|--------------------------|----------------|
| Azithromycin.....                                   | <input type="checkbox"/> |                |
| Ciprofloxacin.....                                  | <input type="checkbox"/> |                |
| Norfloxacin.....                                    | <input type="checkbox"/> |                |
| Erythromycin.....                                   | <input type="checkbox"/> |                |
| Doxycycline (also known as Doxy or Vibramycin)..... | <input type="checkbox"/> |                |
| Other (please specify).....                         | <input type="checkbox"/> | Specify(_____) |
| Don't know/Not sure.....                            | <input type="checkbox"/> |                |

### 10. Were you admitted to hospital overnight because of this illness?

|                          |                            |                    |
|--------------------------|----------------------------|--------------------|
| Yes.....                 | <input type="checkbox"/> 1 |                    |
| No.....                  | <input type="checkbox"/> 2 | <b>Go to Q. 12</b> |
| Don't know/Not sure..... | <input type="checkbox"/> 7 | <b>Go to Q. 12</b> |

### 11. If yes, for how many nights were you hospitalised?

|                          |                            |                             |
|--------------------------|----------------------------|-----------------------------|
| Don't know/Not sure..... | <input type="checkbox"/> 7 | <input type="text"/> NIGHTS |
|--------------------------|----------------------------|-----------------------------|

**Interviewer Note:** Refer to your calendar to determine the interval from DATE 4 WEEKS BEFORE DIARRHOEA BEGAN to DATE 1 DAY BEFORE DIARRHOEA BEGAN.

**“For the next few questions, I would like to ask you about events which may have occurred in the 4 weeks before your illness began, so again that’s from <DATE 4 WEEKS BEFORE DIARRHOEA BEGAN> to <DATE 1 DAY BEFORE DIARRHOEA BEGAN>.”**

### 12. In those 4 weeks, were you taking any antibiotics?

|                          |                            |                    |
|--------------------------|----------------------------|--------------------|
| Yes.....                 | <input type="checkbox"/> 1 |                    |
| No.....                  | <input type="checkbox"/> 2 | <b>Go to Q. 14</b> |
| Don't know/Not sure..... | <input type="checkbox"/> 7 | <b>Go to Q. 14</b> |

**Interviewer Note:** If person can't remember the name of the antibiotic(s), check the DK/NS box and leave the space blank.

**13. What antibiotic(s) were you taking?** [Ask person to get tablet bottle, if possible]

|                       | DK/NS                      | What date did you stop taking these?                                                                                           |
|-----------------------|----------------------------|--------------------------------------------------------------------------------------------------------------------------------|
| a. Antibiotic 1 _____ | <input type="checkbox"/> 7 | <input type="text"/> <input type="text"/> / <input type="text"/> <input type="text"/> (DD/MM) <input type="checkbox"/> 7 DK/NS |
| b. Antibiotic 2 _____ | <input type="checkbox"/> 7 | <input type="text"/> <input type="text"/> / <input type="text"/> <input type="text"/> (DD/MM) <input type="checkbox"/> 7 DK/NS |
| c. Antibiotic 3 _____ | <input type="checkbox"/> 7 | <input type="text"/> <input type="text"/> / <input type="text"/> <input type="text"/> (DD/MM) <input type="checkbox"/> 7 DK/NS |
| d. Antibiotic 4 _____ | <input type="checkbox"/> 7 | <input type="text"/> <input type="text"/> / <input type="text"/> <input type="text"/> (DD/MM) <input type="checkbox"/> 7 DK/NS |

**14. In those 4 weeks, were you taking any regular medication that decreases stomach acid?**

Yes.....  1

No.....  2      **Go to Q. 16**

Don't know/Not sure.....  7      **Go to Q. 16**

**15. Did you take any of the following in the 4 weeks prior to illness?**

Histamine-2 (H<sub>2</sub>) Receptor blocker

|                              | Yes                        | No                         | DK/NS                      |
|------------------------------|----------------------------|----------------------------|----------------------------|
| a. Zantac (Ranitidine).....  | <input type="checkbox"/> 1 | <input type="checkbox"/> 2 | <input type="checkbox"/> 7 |
| b. Tagamet (Cimetidine)..... | <input type="checkbox"/> 1 | <input type="checkbox"/> 2 | <input type="checkbox"/> 7 |
| c. Pepcid (Famotidine).....  | <input type="checkbox"/> 1 | <input type="checkbox"/> 2 | <input type="checkbox"/> 7 |
| d. Axid (Nizatidine).....    | <input type="checkbox"/> 1 | <input type="checkbox"/> 2 | <input type="checkbox"/> 7 |

Proton Pump Inhibitor

|                               |                            |                            |                            |
|-------------------------------|----------------------------|----------------------------|----------------------------|
| a. Losec (Omeprazole).....    | <input type="checkbox"/> 1 | <input type="checkbox"/> 2 | <input type="checkbox"/> 7 |
| b. Nexium (Esomeprazole)..... | <input type="checkbox"/> 1 | <input type="checkbox"/> 2 | <input type="checkbox"/> 7 |
| c. Somac (Pantoprazole).....  | <input type="checkbox"/> 1 | <input type="checkbox"/> 2 | <input type="checkbox"/> 7 |
| d. Pariet (Rabeprazole).....  | <input type="checkbox"/> 1 | <input type="checkbox"/> 2 | <input type="checkbox"/> 7 |
| e. Zoton (Lansoprazole).....  | <input type="checkbox"/> 1 | <input type="checkbox"/> 2 | <input type="checkbox"/> 7 |

**16. Have you ever been told by a doctor that you have any other long lasting condition or chronic illness in which diarrhoea or vomiting is a major symptom? (e.g. Crohn's disease, irritable bowel syndrome, ulcerative colitis, or stomach or oesophagus problems)**

Yes.....  1 Specify(\_\_\_\_\_)

No.....  2

Don't know/Not sure.....  7

17. In the 4 weeks before onset of illness, did you take or receive any of the following?

INTERVIEWER NOTE:  
Cyclosporine ("it's an immunosuppressant")

|                                                                      | Yes                        | No                         | DK/NS                      |
|----------------------------------------------------------------------|----------------------------|----------------------------|----------------------------|
| a. Prednisone<br>or other steroids <u>not</u> used on your skin..... | <input type="checkbox"/> 1 | <input type="checkbox"/> 2 | <input type="checkbox"/> 7 |
| b. Cyclosporine .....                                                | <input type="checkbox"/> 1 | <input type="checkbox"/> 2 | <input type="checkbox"/> 7 |
| c. Chemotherapy.....                                                 | <input type="checkbox"/> 1 | <input type="checkbox"/> 2 | <input type="checkbox"/> 7 |
| d. Radiation therapy.....                                            | <input type="checkbox"/> 1 | <input type="checkbox"/> 2 | <input type="checkbox"/> 7 |

For peer review only

**3. EXPOSURES**

**Interviewer Note:** Refer to your calendar to determine the interval from the DATE 7 DAYS BEFORE DIARRHOEA BEGAN to the DATE 1 DAY BEFORE DIARRHOEA BEGAN

**A. WATER**

**“I’m now going to ask you some questions about water that you consumed in the 7 days before your diarrhoea began, that is from [diarr\_7\_days\_prior] to [diarr\_1\_day\_prior].**

**18. What is your main source of drinking water at home? (select one only)**

INTERVIEWER NOTE:  
Only read out options if they're unsure

- a. A rainwater tank.....  1
- b. A river or stream .....  1
- c. A private well, bore hole, or spearpoint.....  1
- d. A carrier or tank truck.....  1
- e. Municipal water supply (tap water).....  1
- f. Purchased bottle water.....  1
- g. Other water supply.....  1 Specify (\_\_\_\_\_)
- h. Don't know/Unsure.....  1

**Interviewer Note:** If person answered “Yes” to “Municipal water supply” or “Purchased bottle water”, skip to Q.21

**19. Do you usually treat your main source of drinking water before drinking?**

If Required PROMPT: Some examples are chlorination, filtration, boiling and UV treatment of the water

- Yes.....  1 Specify (\_\_\_\_\_)
- No.....  2 **Go to Q. 21**
- Don't know/Not sure.....  7 **Go to Q. 21**

**20. Which of the following treatments are in place? (select all that apply)**

- |                      | Yes                        | No                         | DK/NS                      |
|----------------------|----------------------------|----------------------------|----------------------------|
| a. Chlorination..... | <input type="checkbox"/> 1 | <input type="checkbox"/> 2 | <input type="checkbox"/> 7 |
| b. Filtration.....   | <input type="checkbox"/> 1 | <input type="checkbox"/> 2 | <input type="checkbox"/> 7 |
| c. Boiling.....      | <input type="checkbox"/> 1 | <input type="checkbox"/> 2 | <input type="checkbox"/> 7 |
| d. UV treatment..... | <input type="checkbox"/> 1 | <input type="checkbox"/> 2 | <input type="checkbox"/> 7 |
| e. Other.....        | <input type="checkbox"/> 1 | <input type="checkbox"/> 2 | <input type="checkbox"/> 7 |
| Specify (_____)      |                            |                            |                            |
| f. Don't know.....   | <input type="checkbox"/> 1 | <input type="checkbox"/> 2 | <input type="checkbox"/> 7 |

1  
2  
3  
4  
5  
6  
7  
8  
9  
10  
11  
12  
13  
14  
15  
16  
17  
18  
19  
20  
21  
22  
23  
24  
25  
26  
27  
28  
29  
30  
31  
32  
33  
34  
35  
36  
37  
38  
39  
40  
41  
42  
43  
44  
45  
46  
47  
48  
49  
50  
51  
52  
53  
54  
55  
56  
57  
58  
59  
60

**21. Did you drink water from any of the following sources in the 7 days before onset of diarrhoea...?**  
(Select all that apply)

|                                                  | <b>Yes</b>               |   | <b>No</b>                |   | <b>DK/NS</b>             |   |
|--------------------------------------------------|--------------------------|---|--------------------------|---|--------------------------|---|
| a. A rainwater tank.....                         | <input type="checkbox"/> | 1 | <input type="checkbox"/> | 2 | <input type="checkbox"/> | 7 |
| b. A river or stream .....                       | <input type="checkbox"/> | 1 | <input type="checkbox"/> | 2 | <input type="checkbox"/> | 7 |
| c. A private well, bore hole, or spearpoint..... | <input type="checkbox"/> | 1 | <input type="checkbox"/> | 2 | <input type="checkbox"/> | 7 |
| d. A carrier or tank truck.....                  | <input type="checkbox"/> | 1 | <input type="checkbox"/> | 2 | <input type="checkbox"/> | 7 |
| e. Municipal water supply (tap water).....       | <input type="checkbox"/> | 1 | <input type="checkbox"/> | 2 | <input type="checkbox"/> | 7 |
| f. Purchased bottle water.....                   | <input type="checkbox"/> | 1 | <input type="checkbox"/> | 2 | <input type="checkbox"/> | 7 |
| g. Other water supply.....                       | <input type="checkbox"/> | 1 | <input type="checkbox"/> | 2 | <input type="checkbox"/> | 7 |
| Specify (_____)                                  |                          |   |                          |   |                          |   |

For peer review only

B. DINING LOCATIONS

**“The next few questions ask about places where you may have eaten food in the 7 days before your illness began. So that is from [diarr\_7\_days\_prior] to through [diarr\_1\_day\_prior]”**

**22. During this time, did you eat any food prepared outside your home, for example takeaway, restaurant, someone else’s home?**

- Yes.....  1
- No.....  2 **Go to Q 24**
- Don't know/Not sure.....  7 **Go to Q 24**

**23. Did you eat any food from the following places?**

- |                                                | <b>Yes</b>                 | <b>No</b>                  | <b>DK/NS</b>               |
|------------------------------------------------|----------------------------|----------------------------|----------------------------|
| a. Café or restaurant.....                     | <input type="checkbox"/> 1 | <input type="checkbox"/> 2 | <input type="checkbox"/> 7 |
| b. Home cooked meal at someone else’s home.... | <input type="checkbox"/> 1 | <input type="checkbox"/> 2 | <input type="checkbox"/> 7 |
| c. Kebab shop.....                             | <input type="checkbox"/> 1 | <input type="checkbox"/> 2 | <input type="checkbox"/> 7 |
| d. Other fast food/take away outlet.....       | <input type="checkbox"/> 1 | <input type="checkbox"/> 2 | <input type="checkbox"/> 7 |

**23a How many meals prepared outside of your home, were eaten during this 7 day period?**

- 1-2 meals.....  1
- 3-4 meals.....  2
- ≥ 5 meals.....  3
- Don’t know/Unsure.....  7

C. DAIRY PRODUCTS

**“I would now like to ask you about the dairy products you may have eaten in the 7 days before your diarrhoea began.”**

24. **Did you drink any raw/unpasteurised milk or eat any products made from raw/unpasteurised milk?**

INTERVIEWER NOTE:

Cold-pressed milk is pasteurised and is not to be included as "raw/unpasteurised".

|                            | Yes                        | No                         | DK/NS                      |
|----------------------------|----------------------------|----------------------------|----------------------------|
| a. Unpasteurised milk..... | <input type="checkbox"/> 1 | <input type="checkbox"/> 2 | <input type="checkbox"/> 7 |
| b. Other products.....     | <input type="checkbox"/> 1 | <input type="checkbox"/> 2 | <input type="checkbox"/> 7 |
| Specify ( _____ )          |                            |                            |                            |

D. MEAT AND POULTRY

**“I will now ask you some questions about meat and poultry that you may have eaten in the 7 days before your diarrhoea began, that is from <DATE 7 DAYS BEFORE DIARRHOEA BEGAN> through <DATE 1 DAY BEFORE DIARRHOEA BEGAN>.”**

**25. During these 7 days, did you eat any of the following deli meats or cold cuts?**

|                                        | Yes                        | No                         | DK/NS                      |
|----------------------------------------|----------------------------|----------------------------|----------------------------|
| a. Salami/mettwurst .....              | <input type="checkbox"/> 1 | <input type="checkbox"/> 2 | <input type="checkbox"/> 7 |
| b. Cabanossi/cabana/twiggy sticks..... | <input type="checkbox"/> 1 | <input type="checkbox"/> 2 | <input type="checkbox"/> 7 |
| c. Ham/chicken/turkey/beef.....        | <input type="checkbox"/> 1 | <input type="checkbox"/> 2 | <input type="checkbox"/> 7 |
| d. Devon/frankfurts/cheerios.....      | <input type="checkbox"/> 1 | <input type="checkbox"/> 2 | <input type="checkbox"/> 7 |
| e. Liverwurst.....                     | <input type="checkbox"/> 1 | <input type="checkbox"/> 2 | <input type="checkbox"/> 7 |
| f. Other .....                         | <input type="checkbox"/> 1 | <input type="checkbox"/> 2 | <input type="checkbox"/> 7 |
| Specify (.....)                        |                            |                            |                            |

**26. During these 7 days, did you eat any pate?**

|                          |                            |                   |
|--------------------------|----------------------------|-------------------|
| Yes.....                 | <input type="checkbox"/> 1 |                   |
| No.....                  | <input type="checkbox"/> 2 | <b>Go to Q.29</b> |
| Don't know/Not sure..... | <input type="checkbox"/> 7 |                   |

**27. Was the pate eaten,**

|                           |                            |                 |
|---------------------------|----------------------------|-----------------|
| Chicken pate.....         | <input type="checkbox"/> 1 |                 |
| Duck pate.....            | <input type="checkbox"/> 2 |                 |
| Pork pate.....            | <input type="checkbox"/> 3 |                 |
| Another type of pate..... | <input type="checkbox"/> 4 | Specify (.....) |
| Don't know/Not sure.....  | <input type="checkbox"/> 7 |                 |

**28. Was this pate homemade or purchased from a store?**

|                          |                            |
|--------------------------|----------------------------|
| Homemade.....            | <input type="checkbox"/> 1 |
| Store.....               | <input type="checkbox"/> 2 |
| Don't know/Not sure..... | <input type="checkbox"/> 7 |

**29. During these 7 days, did you eat any other meat or poultry? Like beef, lamb, chicken etc.**

INTERVIEWER NOTE:

This does not include eggs

|                          |                            |                   |
|--------------------------|----------------------------|-------------------|
| Yes.....                 | <input type="checkbox"/> 1 |                   |
| No.....                  | <input type="checkbox"/> 2 | <b>Go to Q.49</b> |
| Don't know/Not sure..... | <input type="checkbox"/> 7 |                   |



**BEEF / VEAL**

30. **During these 7 days, did you eat any beef or veal?**

- Yes.....  1  
 No.....  2 **Go to Q. 32**  
 Don't know/Not sure.....  7

31. **During the 7 days prior, did you eat any of the following beef or veal?**

- |                                                                                                               | Yes                        | No                         | DK/N                                       |
|---------------------------------------------------------------------------------------------------------------|----------------------------|----------------------------|--------------------------------------------|
| a. Minced beef dishes.....<br><i>(eg. bolognese sauce, pie, pastie, lasagne, hamburger patties, sausages)</i> | <input type="checkbox"/> 1 | <input type="checkbox"/> 2 | <input type="checkbox"/> 7                 |
| b. Kebabs/souvlaki.....                                                                                       | <input type="checkbox"/> 1 | <input type="checkbox"/> 2 | <input type="checkbox"/> 7                 |
| c. Offal.....<br><i>(eg. tripe, liver, tongue)</i>                                                            | <input type="checkbox"/> 1 | <input type="checkbox"/> 2 | <input type="checkbox"/> 7 Specify (_____) |
| d. Other.....<br><i>(eg. casserole, stir fry, steak, fillet, roast, beef strips)</i>                          | <input type="checkbox"/> 1 | <input type="checkbox"/> 2 | <input type="checkbox"/> 7                 |

**PORK**

32. **During these 7 days, did you eat any pork?**

- Yes.....  1 Specify (\_\_\_\_\_)  
 No.....  2 **Go to Q. 34**  
 Don't know/Not sure.....  7

33. **During the 7 days prior, did you eat any of the following pork?**

- |                                                                                                               | Yes                        | No                         | DK/N                                       |
|---------------------------------------------------------------------------------------------------------------|----------------------------|----------------------------|--------------------------------------------|
| a. Minced pork dishes.....<br><i>(eg. bolognese sauce, pie, pastie, lasagne, hamburger patties, sausages)</i> | <input type="checkbox"/> 1 | <input type="checkbox"/> 2 | <input type="checkbox"/> 7                 |
| b. Kebabs/souvlaki.....                                                                                       | <input type="checkbox"/> 1 | <input type="checkbox"/> 2 | <input type="checkbox"/> 7                 |
| c. Offal.....<br><i>(eg. tripe, liver, tongue)</i>                                                            | <input type="checkbox"/> 1 | <input type="checkbox"/> 2 | <input type="checkbox"/> 7 Specify (_____) |
| d. Other.....<br><i>(eg. casserole, stir fry, steak, fillet, roast, pork strips)</i>                          | <input type="checkbox"/> 1 | <input type="checkbox"/> 2 | <input type="checkbox"/> 7                 |

**LAMB**

34. **During these 7 days, did you eat any lamb/mutton?**

- Yes.....  1 Specify (\_\_\_\_\_)  
 No.....  2 **Go to Q. 36**  
 Don't know/Not sure.....  7

35. During the 7 days prior, did you eat any of the following lamb/mutton?

|                                                                                                                      | Yes                        | No                         | DK/N                                       |
|----------------------------------------------------------------------------------------------------------------------|----------------------------|----------------------------|--------------------------------------------|
| a. Minced lamb/mutton dishes.....<br><i>(eg. bolognese sauce, pie, pastie, lasagne, hamburger patties, sausages)</i> | <input type="checkbox"/> 1 | <input type="checkbox"/> 2 | <input type="checkbox"/> 7                 |
| b. Kebabs/souvlaki.....                                                                                              | <input type="checkbox"/> 1 | <input type="checkbox"/> 2 | <input type="checkbox"/> 7                 |
| c. Offal.....<br><i>(eg. tripe, liver, tongue)</i>                                                                   | <input type="checkbox"/> 1 | <input type="checkbox"/> 2 | <input type="checkbox"/> 7 Specify (_____) |
| d. Other.....<br><i>(eg. casserole, stir fry, steak, fillet, roast, lamb strips)</i>                                 | <input type="checkbox"/> 1 | <input type="checkbox"/> 2 | <input type="checkbox"/> 7                 |

**GAME MEAT**

36. During these 7 days, did you eat any game meat like kangaroo, wallaby, venison or similar?

|                          |                            |                 |
|--------------------------|----------------------------|-----------------|
| Yes.....                 | <input type="checkbox"/> 1 | Specify (_____) |
| No.....                  | <input type="checkbox"/> 2 |                 |
| Don't know/Not sure..... | <input type="checkbox"/> 7 |                 |

**POULTRY**

37. How often do you usually consume chicken/poultry meat?

|                                         |                            |                   |
|-----------------------------------------|----------------------------|-------------------|
| 3 or more days per week.....            | <input type="checkbox"/> 1 |                   |
| 1-2 days per week.....                  | <input type="checkbox"/> 2 |                   |
| Once per fortnight.....                 | <input type="checkbox"/> 3 |                   |
| Less often than once per fortnight..... | <input type="checkbox"/> 4 |                   |
| Never.....                              | <input type="checkbox"/> 5 | <b>Go to Q.46</b> |
| Don't know/Not sure.....                | <input type="checkbox"/> 7 |                   |

38. During the 7 days before your illness began, did you eat any chicken or other poultry?

|                          |                            |                   |
|--------------------------|----------------------------|-------------------|
| Yes.....                 | <input type="checkbox"/> 1 |                   |
| No.....                  | <input type="checkbox"/> 2 | <b>Go to Q.46</b> |
| Don't know/Not sure..... | <input type="checkbox"/> 7 |                   |

39. How many meals did you eat that contained chicken or other poultry in the 7 days prior to onset of diarrhoea?

|                          |                            |
|--------------------------|----------------------------|
| 1-2 meals.....           | <input type="checkbox"/> 1 |
| 3-4 meals.....           | <input type="checkbox"/> 2 |
| ≥ 5 meals.....           | <input type="checkbox"/> 3 |
| Don't know/Not sure..... | <input type="checkbox"/> 7 |

1  
2  
3  
4  
5  
6  
7  
8  
9  
10  
11  
12  
13  
14  
15  
16  
17  
18  
19  
20  
21  
22  
23  
24  
25  
26  
27  
28  
29  
30  
31  
32  
33  
34  
35  
36  
37  
38  
39  
40  
41  
42  
43  
44  
45  
46  
47  
48  
49  
50  
51  
52  
53  
54  
55  
56  
57  
58  
59  
60

**40. Did you consume any chicken or poultry at home?**

- Yes.....  1  
No.....  2 **Go to Q.43**  
Don't know/Not sure.....  7

**41. Was the chicken or poultry purchased...?**

(Select all that apply)

- Raw and fresh.....  1  
Raw and frozen.....  2  
Pre-cooked.....  3  
Don't know/Not sure.....  4

**42. How was it stored before consumption...?**

(Select all that apply)

INTERVIEWER NOTE:

(On the bench)

This is only to be used if they STORE their meat on the bench, this does not include defrosting their meat on the bench.

- In the freezer.....  1  
In the fridge.....  2  
On the bench.....  3  
Don't know/Not sure.....  4

**43. Prior to cooking, was the chicken rinsed or washed under running water ....?**

- Yes.....  1  
No.....  2  
Don't know/Not sure.....  7

**44. During this did time you eat any of the following cooked meats.....?**

- |                                                                             | Yes                        | No                         | DK/NS                      |
|-----------------------------------------------------------------------------|----------------------------|----------------------------|----------------------------|
| a. Chicken mince.....<br>(including hamburger patties, sausages)            | <input type="checkbox"/> 1 | <input type="checkbox"/> 2 | <input type="checkbox"/> 7 |
| b. Chicken kebabs.....                                                      | <input type="checkbox"/> 1 | <input type="checkbox"/> 2 | <input type="checkbox"/> 7 |
| c. Chicken pieces with bones....<br>(i.e. wings, drumsticks, whole chicken) | <input type="checkbox"/> 1 | <input type="checkbox"/> 2 | <input type="checkbox"/> 7 |
| d. Chicken pieces without bones.<br>(i.e. breast, tenderloins)              | <input type="checkbox"/> 1 | <input type="checkbox"/> 2 | <input type="checkbox"/> 7 |
| e. Offal.....                                                               | <input type="checkbox"/> 1 | <input type="checkbox"/> 2 | <input type="checkbox"/> 7 |
| specify: liver                                                              | <input type="checkbox"/> 1 | other _____                |                            |
| f. Duck.....                                                                | <input type="checkbox"/> 1 | <input type="checkbox"/> 2 | <input type="checkbox"/> 7 |
| g. Turkey.....                                                              | <input type="checkbox"/> 1 | <input type="checkbox"/> 2 | <input type="checkbox"/> 7 |

45. **During this time, on how many days did you eat poultry?**

INTERVIEWER NOTE:

- 1. A pate is included
- 2. Eggs are excluded

Days: \_\_\_\_\_

46. **During this time, on how many days did you eat meat (including poultry)?**

INTERVIEWER NOTE:

Pate is included

Days: \_\_\_\_\_

47. **During the 7 days prior to illness, did [you/they] eat any meat product, which was raw, rare or appeared undercooked?**

- |                          |                          |   |                   |
|--------------------------|--------------------------|---|-------------------|
| Yes.....                 | <input type="checkbox"/> | 1 | <b>Go to Q.49</b> |
| No.....                  | <input type="checkbox"/> | 2 |                   |
| Don't know/Not sure..... | <input type="checkbox"/> | 7 |                   |

48. **Which of the following meats did [you/they] eat that was undercooked?**

- |                                                                                 | Yes                        | No                         | DK/NS                      |
|---------------------------------------------------------------------------------|----------------------------|----------------------------|----------------------------|
| a. Chicken/poultry.....                                                         | <input type="checkbox"/> 1 | <input type="checkbox"/> 2 | <input type="checkbox"/> 7 |
| b. Beef or veal.....                                                            | <input type="checkbox"/> 1 | <input type="checkbox"/> 2 | <input type="checkbox"/> 7 |
| c. Pork.....                                                                    | <input type="checkbox"/> 1 | <input type="checkbox"/> 2 | <input type="checkbox"/> 7 |
| d. Lamb/mutton.....                                                             | <input type="checkbox"/> 1 | <input type="checkbox"/> 2 | <input type="checkbox"/> 7 |
| e. Game meat.....                                                               | <input type="checkbox"/> 1 | <input type="checkbox"/> 2 | <input type="checkbox"/> 7 |
| f. Minced meat items.....<br><i>(eg. including sausages, hamburger patties)</i> | <input type="checkbox"/> 1 | <input type="checkbox"/> 2 | <input type="checkbox"/> 7 |
| g. Offal (specify type) _____.                                                  | <input type="checkbox"/> 1 | <input type="checkbox"/> 2 | <input type="checkbox"/> 7 |
| h. Other meat.....<br>Specify ( _____ )                                         | <input type="checkbox"/> 1 | <input type="checkbox"/> 2 | <input type="checkbox"/> 7 |

1  
2  
3  
4  
5  
6  
7  
8  
9  
10  
11  
12  
13  
14  
15  
16  
17  
18  
19  
20  
21  
22  
23  
24  
25  
26  
27  
28  
29  
30  
31  
32  
33  
34  
35  
36  
37  
38  
39  
40  
41  
42  
43  
44  
45  
46  
47  
48  
49  
50  
51  
52  
53  
54  
55  
56  
57  
58  
59  
60

**49. How do you prefer the following meat to be cooked?**

INTERVIEWER NOTE:

Raw: Not cooked at all

Rare: Mostly red

Medium: Pink through out

Well done: Brown through out

INTERVIEWER NOTE:

If participant answers Medium/Rare select the rarer option.. e.g Rare

|                         | Raw                        | Rare                       | Medium                     | Well done                  |
|-------------------------|----------------------------|----------------------------|----------------------------|----------------------------|
| a. Chicken/Poultry..... | <input type="checkbox"/> 1 | <input type="checkbox"/> 2 | <input type="checkbox"/> 3 | <input type="checkbox"/> 4 |
| b. Beef/Veal.....       | <input type="checkbox"/> 1 | <input type="checkbox"/> 2 | <input type="checkbox"/> 3 | <input type="checkbox"/> 4 |
| c. Pork.....            | <input type="checkbox"/> 1 | <input type="checkbox"/> 2 | <input type="checkbox"/> 3 | <input type="checkbox"/> 4 |
| d. Lamb.....            | <input type="checkbox"/> 1 | <input type="checkbox"/> 2 | <input type="checkbox"/> 3 | <input type="checkbox"/> 4 |
| e. Hamburgers.....      | <input type="checkbox"/> 1 | <input type="checkbox"/> 2 | <input type="checkbox"/> 3 | <input type="checkbox"/> 4 |
| f. Minced meat.....     | <input type="checkbox"/> 1 | <input type="checkbox"/> 2 | <input type="checkbox"/> 3 | <input type="checkbox"/> 4 |

**E. GENERAL KITCHEN PRACTICES**

**“I will now ask you several questions about the way food is usually prepared in your home. Remember, your participation is voluntary and you do not have to answer any of the questions if you don’t want to.”**

**50. How many times per week do you cook for members of your household?**

INTERVIEWER NOTE:

This section around food prepared in the home refers to the person answering the survey (not necessarily the case or control)

- 0.....  1 **Go to Q.63**
- 1-5.....  2
- >5.....  3
- Don't know/Not sure.....  7

**51. Did you handle or prepare any raw meats in the kitchen in the 7 days before your diarrhoea began?**

INTERVIEWER NOTE:

Refers to the person answering the survey

- Yes.....  1
- No.....  2 **Go to Q.57**
- Don't know/Not sure.....  7

**52. Did you handle or prepare raw chicken meat or chicken offal in the 7 days before your diarrhoea began?**

INTERVIEWER NOTE:

Refers to the person answering the survey

- Yes.....  1
- No.....  2
- Don't know/Not sure.....  7

**Interviewer Note:** If person answered “No” to both Q.51 and Q.52 then skip to Q.57

**53. After a knife is used to cut raw meat or poultry, which of the following options do you usually do?**

INTERVIEWER NOTE:

Refers to the person answering the survey

- Continue using the knife as is.....  1
- Rinse the knife before continuing to cook.....  2
- Wipe the knife before continuing to cook.....  3
- Wash the knife with detergent before continuing.....  4
- Change to another knife.....  5
- Other.....  6 Specify ( \_\_\_\_\_ )
- No one prepares meat.....  7 **Go to Q. 57**
- Don't know/Not sure.....  8

*Don't read*

54. After a cutting board is used to cut raw meat or poultry, which of the following options do you usually do?

INTERVIEWER NOTE:

- 1. Does not matter if water is hot or cold
- 2. Refers to the person answering the survey

Continue using the cutting board as is.....  1

Rinse the cutting board before continuing to cook.....  2

Wipe the cutting board before continuing to cook.....  3

Wash the cutting board with detergent before continuing.....  4

Change to another cutting board.....  5

Other.....  6

Specify ( \_\_\_\_\_ )

Don't know/Not sure.....  7

Don't read

55. After handling raw meat or poultry in the kitchen, which of the following would you usually do before continuing to cook?

INTERVIEWER NOTE:

Refers to the person answering the survey

Wipe hands.....  1

Quickly rinse hands under a running tap.....  2

Wash hands with soap and water.....  3

Other.....  4

Specify ( \_\_\_\_\_ )

Don't do anything about hands.....  6 **Go to Q.57**

Don't know/not sure.....  7

Don't read

56. After washing hands during food preparation, what would you usually dry your hands on?

INTERVIEWER NOTE:

Refers to the person answering the survey

Paper towel .....  10

Sponge/cloth.....  11

Tea-towel /hand towel .....  12

Apron.....  13

Don't dry hands.....  14

Other.....  15

Specify ( \_\_\_\_\_ )

Don't know/Not sure.....  77

Don't read

57. In the past 3 months, has anyone in the household cook meat on a BBQ?

Yes.....  1 **Go to Q. 59**

No.....  2 **Go to Q. 59**

Don't know/Not sure.....  7 **Go to Q. 59**

**58. After cooking on the BBQ, where would the cooked meat most likely be placed?**

- Back on the same container.....  1
- Back on the same container after it has been  
rinsed with water .....  2
- Back on the same container after it has been  
wiped off with a towel.....  3
- Back on the same container, after the container  
has been washed with soap and water.....  4
- On a different container .....  5
- Other.....  6
- Don't know/not sure.....  7

Specify ( \_\_\_\_\_ )

*Don't read*

For peer review only

1  
2  
3  
4  
5  
6  
7  
8  
9  
10  
11  
12  
13  
14  
15  
16  
17  
18  
19  
20  
21  
22  
23  
24  
25  
26  
27  
28  
29  
30  
31  
32  
33  
34  
35  
36  
37  
38  
39  
40  
41  
42  
43  
44  
45  
46  
47  
48  
49  
50  
51  
52  
53  
54  
55  
56  
57  
58  
59  
60



F. ANIMAL AND PET EXPOSURE

“The next few questions are about contact with animals in the 7 days before your diarrhoea began.”

59. During this time, did you keep or care for any of the following animals as pets?

INTERVIEWER NOTE:  
Not to include one off contact

|                              | Yes                        | No                         | DK/NS                      |  | Yes                        | No                         | DK/NS                      |
|------------------------------|----------------------------|----------------------------|----------------------------|--|----------------------------|----------------------------|----------------------------|
| a. Cat.....                  | <input type="checkbox"/> 1 | <input type="checkbox"/> 2 | <input type="checkbox"/> 7 |  | <input type="checkbox"/> 1 | <input type="checkbox"/> 2 | <input type="checkbox"/> 7 |
| b. Dog.....                  | <input type="checkbox"/> 1 | <input type="checkbox"/> 2 | <input type="checkbox"/> 7 |  | <input type="checkbox"/> 1 | <input type="checkbox"/> 2 | <input type="checkbox"/> 7 |
| c. Chickens.....             | <input type="checkbox"/> 1 | <input type="checkbox"/> 2 | <input type="checkbox"/> 7 |  | <input type="checkbox"/> 1 | <input type="checkbox"/> 2 | <input type="checkbox"/> 7 |
| d. Other birds.....          | <input type="checkbox"/> 1 | <input type="checkbox"/> 2 | <input type="checkbox"/> 7 |  | <input type="checkbox"/> 1 | <input type="checkbox"/> 2 | <input type="checkbox"/> 7 |
| e. Other.....                | <input type="checkbox"/> 1 | <input type="checkbox"/> 2 | <input type="checkbox"/> 7 |  | <input type="checkbox"/> 1 | <input type="checkbox"/> 2 | <input type="checkbox"/> 7 |
| f. Do not keep any pets..... | <input type="checkbox"/> 7 | <b>Go to Q.67</b>          |                            |  | Specify (.....)            |                            |                            |

**Interviewer Note:** If person answered No/Don't know to Cat then skip to question 62

60. Do you feed your cat raw meat or bones?

|                          |                            |                                                             |
|--------------------------|----------------------------|-------------------------------------------------------------|
| Yes.....                 | <input type="checkbox"/> 1 | Specify (.....)                                             |
| No.....                  | <input type="checkbox"/> 2 | <b>Go to Q. 62</b> (eg. chicken, beef, kangaroo, lamb etc.) |
| Don't know/Not sure..... | <input type="checkbox"/> 7 | <b>Go to Q. 62</b>                                          |

61. How often does your cat get fed raw meat or bones?

|                        |                            |
|------------------------|----------------------------|
| Daily.....             | <input type="checkbox"/> 1 |
| Weekly.....            | <input type="checkbox"/> 2 |
| Monthly.....           | <input type="checkbox"/> 3 |
| Less often.....        | <input type="checkbox"/> 4 |
| Don't know/Unsure..... | <input type="checkbox"/> 7 |

**Interviewer Note:** If person answered No/Don't know to Dog then skip to question 65

62. Do you feed your dog raw meat?

|                          |                            |                                          |
|--------------------------|----------------------------|------------------------------------------|
| Yes.....                 | <input type="checkbox"/> 1 | Specify (.....)                          |
| No.....                  | <input type="checkbox"/> 2 | (eg. chicken, beef, kangaroo, lamb etc.) |
| Don't know/Not sure..... | <input type="checkbox"/> 7 |                                          |

63. Do you feed your dog raw bones?

|                          |                            |                 |
|--------------------------|----------------------------|-----------------|
| Yes.....                 | <input type="checkbox"/> 1 | Specify (.....) |
| No.....                  | <input type="checkbox"/> 2 |                 |
| Don't know/Not sure..... | <input type="checkbox"/> 7 |                 |

**Interviewer Note:** If person answered No/Don't know to questions 62-63 then skip to question 65

**64. How often does your dog get fed raw meat or bones?**

- Daily.....  1
- Weekly.....  2
- Monthly.....  3
- Less often.....  4
- Don't know/Not sure.....  7

**65. Did you get any of your pets in the 4 weeks before your diarrhoea began?**

- Yes.....  1 Pet(s) ( \_\_\_\_\_ )
- No.....  2
- Don't know/Not sure.....  7

**66. Were any of your own pets ill with diarrhoea in the 7 days before your diarrhoea began?**

- Yes.....  1 Pet(s) ( \_\_\_\_\_ )
- No.....  2
- Don't know/Not sure.....  7

**67. In the 7 days before your diarrhoea began, did you have contact with household pet faeces or manure (eg. changing litter boxes or picking up pet faeces with a plastic bag)?**

- Yes.....  1 Pet(s) ( \_\_\_\_\_ )
- No.....  2
- Don't know/Not sure.....  7

**68. Do you live on a farm/hobby farm including a property on acreage 5 acres or over?**

- Yes.....  1
- No.....  2
- Don't know/Not sure.....  7

**69. In the 7 days before your diarrhoea began, did you visit a farm or petting zoo?**

- Yes.....  1 Specify ( \_\_\_\_\_ )
- No.....  2 (eg. private farm, commercial farm, petting zoo etc.)
- Don't know/Not sure.....  7

#### 4. DEMOGRAPHICS

**“I would now like to ask you a few final questions. Remember, your participation is voluntary and you do not have to answer any of the questions if you don’t want to.”**

**70. Is any language other than English spoken in your household?**

- Yes.....  1 Specify ( \_\_\_\_\_ )
- No.....  2
- Don't read* Don't know/Not sure.....  7
- Don't read* Refused.....  9

**71. Are you of Aboriginal or Torres Strait Islander origin?**

- No.....  1
- Aboriginal.....  2
- Torres Strait Islander.....  3
- Both.....  4
- Don't read* Don't know/Not sure.....  7
- Don't read* Refused.....  9

**72. Which of the following places best describe where you live?**

- Inner city or urban area.....  1
- Suburban area.....  2
- Town.....  3
- Rural or remote area community.....  4
- Rural or remote area farm or property.....  5
- Don't read* Don't know/Not sure.....  7
- Don't read* Refused.....  9

**Interviewer Note:** See definitions below.

Inner city area:.....housing close to the centre of a major/capital city

Suburban area:.....housing area further from the centre of the city, which is characterised by the region being primarily a self-contained residential district.

Town:.....community over 2000 people

Rural or remote area community:.....community under 2000

Rural or remote area farm or property

**73. Does your occupation involve any of the following?**

- Working with raw meat.....  11  
(eg. restaurants, butchery, abattoir etc.)
- Working with animals.....  12  
(eg. farmer, zookeeper, vet/nurse etc.)
- Other type of occupation.....  13
- Retired.....  14
- CASE not of working age.....  15
- Don't know/Unsure.....  17

74. What is the highest level of education reached by anyone in your household?

- Schooling to year 10 or below.....  12
- Secondary school, above year 10.....  13
- Technical or further educational institution.....  14  
*(eg. TAFE, apprenticeship, college etc.)*
- University degree—Undergraduate .....  15
- University degree—Postgraduate (Masters, doctorate).  16
- Don't know/not sure.....  7
- Refused.....  9

Don't read  
Don't read

**“Now I am going to read you a list of income categories. Please stop me when a category best describes your total household income, before taxes, in the last financial year? That is the total figure for all household members.”**

75. Last year the total income for your household was....?

- Less than \$25,000.....  1
- \$25,000 to \$50,000.....  2
- Between \$50,000 and \$100,000.....  3
- Between \$100,000 and \$150,000.....  4
- More than \$150,000.....  5
- Don't know/Not sure.....  7
- Refused.....  9

Don't read  
Don't read

76. As part of this research we are planning to do a follow-up study. Would you be happy for us to contact you in ~6 months' time?"

- Yes.....  1
- No.....  2 **Skip to end of questionnaire**

**Interviewer Note:** If person answered No to Q 76 then skip to the end of the questionnaire

**Details required:**

Name: \_\_\_\_\_

Phone number: \_\_\_\_\_

Email address: \_\_\_\_\_

**“That’s my last question. Thank you very much for your time and cooperation.”**

**COMPLETE AFTER INTERVIEW**

**Interviewer initials** \_\_\_\_\_

**Interview stop time** \_\_\_\_\_

**Length of interview** \_\_\_\_\_ MINUTES

**Respondent recall:**

- Poor  1
- Fair  2
- Average  3
- Good  4
- Excellent  5

# BMJ Open

## Investigating locally-relevant risk factors for *Campylobacter* infection in Australia: protocol for a case-control study and genomic analysis

|                                 |                                                                                                                                                                                                                                                                                                                                                                                                                                                                                                                                                                                                                                                         |
|---------------------------------|---------------------------------------------------------------------------------------------------------------------------------------------------------------------------------------------------------------------------------------------------------------------------------------------------------------------------------------------------------------------------------------------------------------------------------------------------------------------------------------------------------------------------------------------------------------------------------------------------------------------------------------------------------|
| Journal:                        | <i>BMJ Open</i>                                                                                                                                                                                                                                                                                                                                                                                                                                                                                                                                                                                                                                         |
| Manuscript ID                   | bmjopen-2018-026630.R1                                                                                                                                                                                                                                                                                                                                                                                                                                                                                                                                                                                                                                  |
| Article Type:                   | Protocol                                                                                                                                                                                                                                                                                                                                                                                                                                                                                                                                                                                                                                                |
| Date Submitted by the Author:   | 03-Oct-2018                                                                                                                                                                                                                                                                                                                                                                                                                                                                                                                                                                                                                                             |
| Complete List of Authors:       | Varrone, Liana; University of Queensland, Faculty of Medicine; Menzies School of Health Research, Stafford, Russell; Queensland Health, OzFoodNet<br>Lilly, Kim; Hunter New England Population Health<br>Selvey, Linda; University of Queensland, Faculty of Medicine<br>Glass, Kathryn; The Australian National University, National Centre for Epidemiology and Population Health<br>Ford, Laura; Australian National University, College of Health and Medicine<br>Bulach, Dieter; The University of Melbourne, Melbourne Bioinformatics<br>Kirk, Martyn; The Australian National University, National Centre for Epidemiology and Population Health |
| <b>Primary Subject Heading</b>: | Public health                                                                                                                                                                                                                                                                                                                                                                                                                                                                                                                                                                                                                                           |
| Secondary Subject Heading:      | Epidemiology, Infectious diseases, Research methods                                                                                                                                                                                                                                                                                                                                                                                                                                                                                                                                                                                                     |
| Keywords:                       | Epidemiology < INFECTIOUS DISEASES, Gastrointestinal infections < GASTROENTEROLOGY, Public health < INFECTIOUS DISEASES                                                                                                                                                                                                                                                                                                                                                                                                                                                                                                                                 |
|                                 |                                                                                                                                                                                                                                                                                                                                                                                                                                                                                                                                                                                                                                                         |

SCHOLARONE™  
Manuscripts

## Investigating locally-relevant risk factors for *Campylobacter* infection in Australia: protocol for a case-control study and genomic analysis

Liana Varrone<sup>1</sup> Darwin, Australia.

Russell J. Stafford<sup>2</sup> Brisbane, Australia.

Kim Lilly<sup>3</sup> Newcastle, Australia.

Linda Selvey<sup>1</sup> Brisbane, Australia.

Kathryn Glass<sup>4</sup> Canberra, Australia.

Laura Ford<sup>4</sup> Canberra, Australia.

Dieter Bulach<sup>5,6</sup> Melbourne, Australia.

Martyn D. Kirk<sup>4</sup> Canberra, Australia.

On behalf of The CampySource Project Team

1. The University of Queensland, Faculty of Medicine.
2. Queensland Health, OzFoodNet.
3. Hunter New England Population Health.
4. The Australian National University, College of Health and Medicine.
5. The University of Melbourne, Melbourne Bioinformatics.
6. The Peter Doherty Institute, Microbiological Diagnostic Unit Public Health Laboratory.

Corresponding author: Martyn Kirk

Postal address: 62 Mills Road, Acton, ACT 2601, Australia

Email address: martyn.kirk@anu.edu.au

Telephone number: +612 6125 5609

Word count: 3,929

(excl. title page, abstract, references, figures & tables)

## ABSTRACT

### Introduction:

The CampySource project aims to identify risk factors for human *Campylobacter* infection in Australia. We will investigate locally-relevant risk factors and those significant in international studies in a case-control study. Case isolates and contemporaneous isolates from food and animal sources will be sequenced to conduct source attribution modelling, and findings will be combined with the case-control study in a source-assigned analysis.

### Methods and analysis:

The case-control study will include 1,200 participants (600 cases and 600 controls) across three regions in Australia. Cases will be recruited from campylobacteriosis notifications to health departments. Only those with a pure and viable *Campylobacter* isolate will be eligible for selection to allow for whole genome sequencing of isolates. Controls will be recruited from notified cases of influenza, frequency matched by sex, age group and geographical area of residence. All participants will be interviewed by trained telephone interviewers using a piloted questionnaire.

We will collect *Campylobacter* isolates from retail meats and companion animals (specifically dogs), and all food, animal and human isolates will undergo whole genome sequencing. We will use sequence data to estimate the proportion of human infections that can be attributed to animal and food reservoirs (source attribution modelling), and to identify spatial clusters and temporal trends. Source-assigned analysis of the case-control study data will also be conducted where cases are grouped according to attributed sources.

### Ethics and dissemination:

Human and animal ethics have been approved. Genomic data will be published in online archives accompanied by basic metadata. We anticipate several publications to come from this study.

### KEYWORDS

*Campylobacter*, case-control study, risk factors, Australia, whole genome sequencing, source attribution, source-assigned analysis

## ARTICLE SUMMARY

### Strengths and limitations of this study

- Case-control study is well-powered to identify locally-relevant risk factors.
- Linking genomic data to the case-control study strengthens the analysis by enabling source attribution and source-assigned analyses to be conducted.
- Case-control questionnaire questions are being validated in a separate study, demonstrating the reliability of participant recall.
- Potential reporting bias due to inaccurate recall of study participants.
- Case-control study lacks efficiency for risk factors with high levels of exposure in the study population.

## INTRODUCTION

*Campylobacter* infection is the most commonly notified cause of foodborne gastroenteritis in Australia,<sup>1-3</sup> as well as a leading cause of bacterial gastroenteritis world-wide.<sup>4</sup> At the introduction of Australia's National Notifiable Diseases Surveillance System (NNDSS) in 1991 the incidence rate of notified campylobacteriosis cases was 79.1/100,000 population,<sup>5</sup> and despite notification rates plateauing in recent years, incidence had risen to 139.7/100,000 population in Australia in 2015,<sup>5</sup> with an estimated 10 cases for every notified case within the community.<sup>6</sup> By comparison, the incidence rate of campylobacteriosis in New Zealand in 2014 was 150.3/100,000 population,<sup>7</sup> with an estimated 10-30 cases in the community for every notified case.<sup>8</sup> *Campylobacter* notification rates in Australia and New Zealand are still among the highest in the world across high-income countries. Most countries in the European Union consistently report annual campylobacteriosis notification rates below 100/100,000 population.<sup>2</sup>

Two species of *Campylobacter*—*Campylobacter jejuni* and *C. coli*—contribute to approximately 95% of human campylobacteriosis.<sup>9</sup> These *Campylobacter* species are commonly detected in sewage and surface water,<sup>10</sup> reside in the gastrointestinal tract of birds and animals,<sup>11</sup> and are frequently found in raw meat, particularly poultry, and raw milk.<sup>12 13</sup> Campylobacteriosis is mostly foodborne, with an estimated 77% of cases transmitted via food consumption in Australia.<sup>14 15</sup> Direct and indirect zoonotic transmission can occur via animal contact (direct) or faecally-contaminated water or environments (indirect). Person-to-person transmission is considered rare.<sup>16</sup> The majority of cases are thought to be sporadic, with outbreaks less commonly detected.<sup>17</sup> Most outbreaks are linked to the consumption of poultry, raw milk, or contaminated water.<sup>17 18</sup>



1  
2  
3 Targeted control of foodborne bacterial pathogens generally depends on identification of sources  
4 and routes of transmission. Since *Campylobacter* are ubiquitous in the environment and most cases  
5 are sporadic, identifying sources is difficult. Source attribution methods require isolation of strains  
6 from reservoirs to compare *Campylobacter* strain diversity in foods and animals to that in human  
7 infections. Beef, sheep and pig meat have a lower prevalence of *Campylobacter* contamination than  
8 chicken meat (<5% to 14%),<sup>19-21</sup> but a higher prevalence is found in animal offal such as liver,<sup>22</sup> thus  
9 making offal a valuable source of host-associated strains of *Campylobacter* in low-prevalence meats.  
10  
11  
12  
13

## 14 **STUDY RATIONALE**

15  
16 In the United States, evidence from case-control studies have led to policy change, including changes  
17 to chicken slaughtering techniques. The incidence of human *Campylobacter* infection has declined in  
18 the US since this policy was introduced in 1997.<sup>23</sup> More recently, evidence from source attribution  
19 analyses in New Zealand has led to the development of poultry production policies and practices  
20 aimed at reducing the risk of *Campylobacter* transmission via poultry food products.<sup>24</sup> New Zealand  
21 has seen a 74% reduction in the number of campylobacteriosis cases attributed to poultry in the  
22 region, as well as a 54% reduction in cases overall.<sup>25</sup>  
23  
24  
25  
26  
27

28 Source attribution modelling enables us to determine which foods and animals are the most likely  
29 sources of infection with each *Campylobacter* strain type, and the proportion of cases attributed to  
30 each source. This can be done with simple proportional similarity index (PSI) calculations, or by using  
31 more complex models.<sup>24</sup> Source attribution also allows for human campylobacteriosis cases to be  
32 grouped by potential source, increasing the specificity of risk factor analyses. These source-assigned  
33 analyses combine the epidemiological information gained through the traditional case-control study  
34 with source attribution modelling to provide greater explanatory power to investigate locally-  
35 relevant risk factors.  
36  
37  
38  
39  
40

## 41 **OBJECTIVES**

42 This study aims to:

- 43 1. Identify dietary, environmental and behavioural risk factors for *Campylobacter* infection in  
44 Australia
  - 45 2. Strengthen the epidemiological evidence for previously identified risk factors in Australia
  - 46 3. Identify strain-specific risk factors for infection using Whole Genome Sequencing (WGS) data  
47 from case isolates
- 48  
49  
50  
51  
52  
53

## 54 **HYPOTHESES**

55  
56  
57  
58  
59  
60

We will test several hypotheses regarding specific risk factors for *Campylobacter* infection in Australia. The hypotheses are based on exposures which have previously been identified as risk factors for *Campylobacter* infection in Australia as well as internationally.

We hypothesise that:

1. Persons who consume undercooked meats, particularly chicken, are at increased risk of infection.
2. Persons who consume offal are at increased risk of infection.
3. Persons who own companion animals (especially puppies) are at increased risk of infection.
4. Poor food hygiene and handling practices in the home increase the risk of infection.
5. Most human infections will be attributed to consumption of chicken meat.
6. There will be a high level of genetic diversity amongst *Campylobacter* strains.

## STUDY DESIGN

We will conduct a case-control study including genomic testing over a two-year period in three sentinel sites: the state of Queensland (QLD), the Australian Capital Territory (ACT), and Hunter New England (HNE) region of New South Wales (Figure 1). Sporadic cases of culture-positive *Campylobacter* infection will be identified either through state notifiable disease registers, from local pathology service databases or local notification databases. An isolate from each case will be paired with epidemiological data from the case interview. One control will be recruited for each case who participates in the study, with trained interviewers conducting telephone interviews with both cases and controls. Participants will be interviewed using a questionnaire that has been specifically designed to collect information on known potential risk factors. This questionnaire will include a selection of questions being validated in a separate study (Liana Varrone, Validation of questions designed for gastroenteritis investigation). For cases, the questions will cover the seven days prior to the onset of illness, while controls will be questioned on the seven days prior to interview. Meanwhile, *Campylobacter* isolates will also be collected from food and animal samples. All human and non-human isolates will undergo whole genome sequencing for comparison in source attribution modelling. Data for this study will be collected from 1<sup>st</sup> March 2017 to 1<sup>st</sup> March 2019.

**Figure 1. Map of Australian states and territories, showing the Hunter New England region.**

## Patient and public involvement

To develop the study, we engaged state and territory health departments, food safety agencies and industry to establish research questions and methods. The process involved a dedicated workshop, followed by teleconferences and an iterative process of drafting study documentation. We also established a reference panel, which includes representatives from senior levels of government and industry bodies. No patients or other members of the public were involved in the development of this study.

## STUDY POPULATION

The three sentinel sites cover a population of approximately 6.1 million people. Based on notification and diagnostic pathology data, we expect approximately 8,650 *Campylobacter* cases to be notified across these sites during the study period.

## DEFINITION AND SELECTION OF CASES

### Case definition

We define a case as a person from any of the three participating sites with a recent history of acute diarrhoea and a culture-positive stool result for *Campylobacter*.

## SAMPLE SIZE

We used risk factor prevalence data from a previous national *Campylobacter* case-control study in 2001/2002 to estimate sample size for this study.<sup>26</sup> For example, the prevalence of chicken consumption among controls in 2001/2002 was 80%. A sample size of approximately 1,040 subjects (520 cases; 520 controls) would enable the study to detect an association between chicken consumption and illness with an odds ratio of 1.6, at 80% power and  $\alpha = 0.05$ , as reported in the previous study. Sample size estimates for other potential risk factors are listed in Table 1.

**Table 1. Sample size estimates for an unmatched case-control study**

| Risk factor | Prevalence of exposure among controls (%) | Prevalence of exposure among cases (%) | Odds ratio | No. of required study subjects |
|-------------|-------------------------------------------|----------------------------------------|------------|--------------------------------|
| Beef        | 78                                        | 85                                     | 1.6        | 960                            |
| Pork        | 52                                        | 60                                     | 1.4        | 1130                           |
| Lamb        | 42                                        | 50                                     | 1.4        | 1120                           |
| Chicken     | 80                                        | 87                                     | 1.6        | 1040                           |
| Offal       | 2.0                                       | 5.0                                    | 2.6        | 1154                           |
| Puppies     | 2.1                                       | 5.4                                    | 2.7        | 1040                           |

80% power and  $\alpha = 0.05$

From these calculations, we estimate that a study of 1,200 subjects (600 cases; 600 controls) will adequately detect significant associations of these magnitudes for potential risk factors of interest.

Queensland and Hunter New England sites will each enrol at least 250 cases into the study, while ACT will enrol at least 100 cases. Based on the previous Australian case-control study,<sup>26</sup> we expect approximately 80% of selected notified cases to be eligible and participate in the study (Table 2).

**Table 2. Sampling method for cases in each site**

| State                    | Expected number of notified cases during study period | Estimated cases from participating pathology laboratory | Culture +ve cases | Sequential sampling of notified cases | Total no. of cases | Expected no. to be recruited (~ 80% participation rate) |
|--------------------------|-------------------------------------------------------|---------------------------------------------------------|-------------------|---------------------------------------|--------------------|---------------------------------------------------------|
| QLD                      | 7000                                                  | 2800 (40%)                                              | 1260 (45% in QLD) | Select every 4 <sup>th</sup> case     | 315                | 250                                                     |
| ACT                      | 600                                                   | 130                                                     | 130               | Include all notified cases            | 130                | 100                                                     |
| NSW (Hunter New England) | ~1050                                                 | 313                                                     | 313               | Include all notified cases            | 313                | 250                                                     |
| <b>Total</b>             | <b>8650</b>                                           | <b>3243</b>                                             | <b>1703</b>       |                                       | <b>758</b>         | <b>600</b>                                              |

In Queensland, we will obtain cases from one private pathology provider reporting approximately 40% of the state's *Campylobacter* notifications. We estimate that this provider will notify 2,800 cases during the study period with an estimated 45% of these being culture-positive (1,260 notified cases). In ACT, approximately 600 *Campylobacter* notifications are expected during the study period; 130 are expected from the participating pathology laboratory. In Hunter New England, approximately 1,050 *Campylobacter* notifications are expected during the study period; 313 of these notifications will be from the participating pathology laboratory.

#### **Enrolment of Cases**

We will enrol all cases who meet the eligibility criteria (Table 3). Each site will check for new notifications of culture-positive *Campylobacter* infection daily, with only culture-positive *Campylobacter* cases eligible for this study. If a case refuses to participate in the study, we will select a subsequent case for inclusion. Enrolment of cases will depend on consent from the patient, or in the event of a child aged less than 18 years, consent from either one of the parents or the child's guardian. We will interview cases as soon as possible by telephone, preferably within two weeks of notification from the laboratory. It will be at the parent's or guardian's discretion as to whether a

child aged between 15 and 17 years is interviewed directly. The parent or guardian will be interviewed for cases aged less than 15 years.

**Table 3. Eligibility criteria for cases and controls**

| Criteria                                                                                                                                                          | Cases   | Controls                                  |
|-------------------------------------------------------------------------------------------------------------------------------------------------------------------|---------|-------------------------------------------|
| Had diarrhoea ( $\geq 3$ loose bowel movements in 24hrs)                                                                                                          | Include | Exclude                                   |
| Known date of illness onset                                                                                                                                       | Include | N/A                                       |
| Household members positive for <i>Campylobacter</i> in 4 weeks prior to onset of illness                                                                          | Exclude | Exclude (4 weeks prior to interview date) |
| Household members experiencing diarrhoea in 4 weeks prior to onset of illness                                                                                     | Exclude | Exclude (4 weeks prior to interview date) |
| Travelled outside of Australia in 2 weeks prior to onset of illness                                                                                               | Exclude | Exclude (2 weeks prior to interview date) |
| Travelled interstate for the entire 2 weeks prior to onset of illness                                                                                             | Exclude | Exclude (2 weeks prior to interview date) |
| Can't speak English                                                                                                                                               | Exclude | Exclude                                   |
| Not able to answer questions for some other reason (e.g. intellectually disabled)                                                                                 | Exclude | Exclude                                   |
| Not contactable after 6 telephone attempts                                                                                                                        | Exclude | Exclude                                   |
| Live outside the catchment areas                                                                                                                                  | Exclude | Exclude                                   |
| Do not have a telephone number available for their primary residence, or a mobile phone                                                                           | Exclude | Exclude                                   |
| An enteric pathogen other than <i>Campylobacter</i> was isolated/detected in their stool (excluding <i>Blastocystis hominis</i> and <i>Dientamoeba fragilis</i> ) | Exclude | N/A                                       |

#### DEFINITION AND SELECTION OF CONTROLS

We will recruit controls from notified cases of influenza, frequency matched by sex, age group and geographical area of residence by Statistical Area Level 4 (SA4). These controls will be selected with a delay of at least six months from their influenza infection to ensure that controls have returned to eating their customary diet.

1  
2  
3 Each participating site (QLD, ACT or HNE) will establish a database of controls (previous influenza  
4 cases). All cases of influenza notified to the health department in each site between 1<sup>st</sup> January and  
5 31<sup>st</sup> December 2017 will be entered into this control database. The age bands are 0-4 years, 5-14  
6 years, 15-34 years, 35-54 years, 55-74 years, and ≥75 years. An appropriate control will be randomly  
7 selected from the database within 30 days of interview of the notified case.  
8  
9

### 10 11 **Case and control recruitment**

12 Interviewers trained in computer-assisted telephone interviewing (CATI) will conduct telephone  
13 interviews. A maximum of six attempts will be made to contact any one case or control, with no  
14 more than three attempts in any one day. Three calls will be attempted between 9:00am and  
15 3:59pm, and three attempts between 4:00pm and 8:00pm. A text message will be sent to the  
16 potential participant after three failed call attempts, indicating that Public Health is trying to contact  
17 them. This protocol will be continued until the person is enrolled or excluded.  
18  
19

### 20 21 **QUESTIONNAIRES**

22 We will use specific case and control questionnaires for all participants (see Appendix 1). Cases will  
23 be asked additional questions about the clinical course of their illness and treatment. Interviewers  
24 will ask identical questions regarding exposures such as foods consumed, dining locations, water  
25 sources, domestic food handling techniques and exposure to animals of cases and controls.  
26 Questions on foods consumed, dining locations, water consumed, animal and pet exposures will be  
27 asked based on a seven-day history. Questions on international travel will be asked based on a two-  
28 week history. Antibiotic and antacid consumption, immunosuppressive treatment and household  
29 history of diarrhoea will be based on a four-week history. Questions on food handling and general  
30 kitchen practices will be based on usual practices rather than recent history. Demographic  
31 information will be collected from cases and controls. Contact information required to conduct  
32 interviews will be stored in a password-protected Excel document with only those needing to  
33 contact individuals given access. Piloted questionnaires were modified to remove repetitions,  
34 improve clarity, and to ensure that interviews could be conducted within 20 minutes.  
35  
36

### 37 38 **DATA HANDLING & RISK FACTOR ANALYSIS**

39 We will undertake descriptive reporting of campylobacteriosis incidence by person, place and time.  
40 We will also describe the severity of symptoms, treatment, and burden of illness.  
41  
42

43 Risk factor analysis will involve the examination of two-by-two contingency tables with chi square or  
44 exact tests to determine the presence of univariable associations between variables and disease. To  
45 measure the strength of an association, we will estimate odds ratios and calculate 95% confidence  
46  
47  
48  
49  
50  
51  
52  
53  
54  
55  
56  
57  
58  
59  
60

intervals in a univariable analysis, followed by multivariable logistic regression modelling to adjust for potential confounders. Risk factors selected for inclusion in the regression model will include age, season and geographic area, variables with a significant univariable association with disease, and variables with a P-value  $\leq 0.25$  that are biologically plausible and of interest to the research team.

## LABORATORY ANALYSES

### Human samples

As outlined in Table 2, it is expected that 250 human isolates from Hunter New England, 250 from Queensland, 100 from Victoria and 100 from ACT will be sequenced. The initial isolation and confirmation of *Campylobacter* infection will be performed locally in each State/Territory. Only samples with a pure and viable culture will undergo WGS.

### Animal and food samples

We will collect samples from chicken meat (covering the two production methods of continually housed and free range/housed), beef, lamb, pork, and from pet dogs. Given low prevalence of *Campylobacter* in meats other than chicken, samples will be collected from offal (preferably liver) from bovine, ovine and porcine sources to ensure sufficient positive samples are obtained for the study. Given the rising importance of chicken liver pate as a source of outbreaks in Australia,<sup>27</sup> chicken offal will also be sampled. Sample sizes by source are based on data from two states to ensure 50 positive samples per food source, and 30 samples in companion animals (Table 4). We will also contact veterinary clinics and teaching hospitals to ensure sufficient *Campylobacter*-positive samples from dogs. Water samples have been omitted from the genomic aspect of this study due to logistical constraints in sampling untreated water sources across the large geographical area involved in this study, and the complexity of designing an appropriate sampling frame. As there is a lack of evidence implicating municipal drinking water as sources of *Campylobacter* infection in Australia<sup>1 26</sup> we excluded water sampling from this study.

**Table 4. Sampling to ensure 50 isolates per food source and 30 isolates from companion animals**

|                    | Foods                     |                   |              |              |              |              | Animals |             |
|--------------------|---------------------------|-------------------|--------------|--------------|--------------|--------------|---------|-------------|
|                    | Chicken                   |                   |              | Beef         | Lamb         | Pork         | Dogs    | Total       |
|                    | <i>Continually housed</i> | <i>Free-range</i> | <i>Offal</i> | <i>Offal</i> | <i>Offal</i> | <i>Offal</i> |         |             |
| Assumed prevalence | 0.7                       | 0.7               | 0.7          | 0.14         | 0.6          | 0.22         | 0.2     |             |
| Samples required   | 72                        | 72                | 72           | 286          | 100          | 272          | 150     | <b>1041</b> |
| Positive isolates  | 50                        | 50                | 50           | 40           | 60           | 60           | 30      | <b>330</b>  |

1  
2  
3  
4  
5 The initial isolation and confirmation of *Campylobacter* will be performed locally at laboratories in  
6 each State/Territory, with isolates forwarded to the Microbiological Diagnostic Unit Public Health  
7 Laboratory for WGS, except Queensland isolates which will be sequenced at Queensland Health. To  
8 detect seasonal and temporal variation in *Campylobacter* genetic types, 1041 non-human samples  
9 (estimated to produce 330 *Campylobacter* isolates) will be collected over a period of one year in  
10 Queensland, and two years in New South Wales. To assess latitudinal variation in chicken meat  
11 samples across eastern Australia, 105 chicken samples (70 chicken meat and 35 chicken offal) will be  
12 collected over a six-month period in Victoria. Food samples will be collected monthly from retail  
13 premises, using protocols from surveys undertaken in 2014 by partner organisations, with a pilot of  
14 30 isolates in Queensland.

15  
16 We will also collect an additional 20-30 human isolates from four additional Australian jurisdictions  
17 not participating in this case-control study to undergo WGS. This will be done over a two-month  
18 period that overlaps with the case-control study sample collection, and is planned to help inform the  
19 generalisability of the case-control study.

#### 20 21 22 23 24 25 26 27 28 **SEQUENCING AND SEQUENCE DATA PROCESSING**

29  
30 *Campylobacter* isolates selected for sequencing will be repurified on solid medium and a single  
31 colony selected for preparation of genomic DNA. A sequencing library will be prepared from the  
32 genomic DNA for sequencing on the Illumina sequencing platform (MiSeq or NextSeq). A sample of  
33 the selected colony will be regrown and cryopreserved (resuspended in liquid medium  
34 supplemented with 10% Glycerol and stored at -80°C). In some cases, *Campylobacter* enrichment  
35 cultures will be cryopreserved to enable future investigation of the genetic diversity of  
36 *Campylobacters* present. The short-read, paired end dataset produced by the Illumina Instrument  
37 from the genomic DNA of each isolate will be processed to produce a draft genome sequence for the  
38 isolate using a *de novo* assembler such as MEGAHIT.<sup>28</sup> The draft genome sequence will be annotated  
39 using Prokka.<sup>29</sup> We will use the draft genome sequence to perform the initial sub-species  
40 classification by deriving a multilocus sequence type (MLST) using the "*Campylobacter jejuni/coli*"  
41 typing scheme (pubmlst.org). Again, using the draft genome sequence, further typing e.g. virulence  
42 factors (<http://www.mgc.ac.cn/VFs/>) or antimicrobial resistance genotype  
43 (<https://cge.cbs.dtu.dk/services/ResFinder/>) will be performed using Abricate  
44 (<https://github.com/tseemann/abricate>). We will perform comparative genomics to examine the  
45 genetic relationships between selected subgroups of isolates in more detail using Nullarbor  
46 (<https://github.com/tseemann/nullarbor>).



## SOURCE ATTRIBUTION MODELLING

We will analyse the epidemiological data within designated MLST groups or other typing groups derived from the genomic sequence data. Source attribution modelling and source-assigned analyses will be conducted.

Source attribution models combine typing data from isolates from food, animal and humans to estimate the proportion of human infections that can be attributed to animal and food reservoirs.<sup>30</sup> <sup>31</sup> Once inferred MLSTs have been ascertained, the proportional similarity index<sup>25</sup> will be used to assess similarities by source. We will then undertake source attribution analyses by adapting the asymmetric island model which has previously been applied to MLST data<sup>25 32</sup> using Markov Chain Monte Carlo (MCMC) methods<sup>33</sup> implemented using the free software WinBUGS.<sup>34</sup> These methods will first be applied to MLST data extracted from whole genome sequences (the aforementioned “inferred MLSTs”), and then compared to structured phylogenetic modelling approaches<sup>35 36</sup> that provide scope to infer inter-host transmission.

We will then group cases according to putative source based on these source attribution methods.<sup>37</sup> For example, all isolates attributed to chicken will be grouped together, regardless of differing strains. These cases attributed to chicken will then be compared to all controls in a risk factor analysis to produce a source-assigned analysis.

## SPATIAL CLUSTERS AND TEMPORAL TRENDS

We will use newly-designated WGS-based MLSTs to assess heterogeneity in isolates from food sources and companion animals in Queensland and New South Wales, and in isolates from chicken meat and humans across Queensland, New South Wales, Victoria and ACT. A two-year sampling framework in New South Wales, one year of sampling in Queensland, and previous survey work in these states will allow us to assess the extent of seasonal and temporal trends. Postcode-level data associated with human illnesses will be used to detect space-time clusters using a scan statistic implemented in the free software SaTScan, at the Statistical Area 1 level.<sup>38</sup> We will use a retrospective space-time permutation model to detect high risk clusters by comparing the observed number of illnesses to the expected number in that geographic zone and time-period.<sup>39</sup>

## STUDY LINKAGES AND COLLABORATIONS

The CampySource Project Team comprises three working groups and a reference panel. The working groups focus on: food and animal sampling, epidemiology and modelling, and genomics. The reference panel includes expert representatives from government and industry.

1  
2  
3 The study is supported by the following partner organisations: the Australian National University,  
4 Massey University, University of Melbourne, Queensland Health, Queensland Health Forensic and  
5 Scientific Services, New South Wales Health, Hunter New England Health, Victorian Department of  
6 Health and Human Services, Food Standards Australia New Zealand, Commonwealth Department of  
7 Health and AgriFutures Australia – Chicken Meat Program.  
8  
9

10  
11 CampySource is also supported by collaboration with the following organisations: ACT Health,  
12 Sullivan Nicolaidis Pathology, University of Queensland, Primary Industries and Regions South  
13 Australia, Department of Health and Human Services Tasmania, Meat and Livestock Australia, and  
14 New Zealand Ministry for Primary Industries.  
15  
16

### 17 18 **ACKNOWLEDGEMENTS**

19  
20 The CampySource Project Team consists of: Nigel P. French, Massey University, New Zealand; Mary  
21 Valcanis, The University of Melbourne; Dieter Bulach, The University of Melbourne; Emily Fearnley,  
22 The Australian National University; Russell Stafford, Queensland Health; John Bates, Queensland  
23 Health; Trudy Graham, Queensland Health; Keira Glasgow, Health Protection NSW; Kirsty Hope,  
24 Health Protection NSW; Arie H. Havelaar, The University of Florida, USA; Joy Gregory, Department of  
25 Health and Human Services, Victoria; James Flint, Hunter New England Health; Simon Firestone, The  
26 University of Melbourne; James Conlan, Food Standards Australia New Zealand; James J. Smith,  
27 Queensland Health; Sally Symes, Department of Health and Human Services, Victoria; Barbara  
28 Butow, Food Standards Australia New Zealand; Liana Varrone, The University of Queensland; Linda  
29 Selvey, The University of Queensland; Deborah Denehy, ACT Health; Radomir Krsteski, ACT Health;  
30 Natasha Waters, ACT Health; Kim Lilly, Hunter New England Health; Julie Collins, Hunter New  
31 England Health; Tony Merritt, Hunter New England Health; Joanne Barfield, Hunter New England  
32 Health; Ben Howden, The University of Melbourne; Kylie Hewson, AgriFutures Australia – Chicken  
33 Meat Program; Laura Ford, The Australian National University; Liz Walker, The Australian National  
34 University; Cameron Moffatt, The Australian National University; Martyn Kirk, The Australian  
35 National University; and Kathryn Glass, The Australian National University.  
36  
37  
38  
39  
40  
41  
42  
43  
44

45 While undertaking studies, LV is supported through an Australian Government Research Training  
46 Program (RTP) Scholarship.  
47  
48

### 49 50 **DECLARATIONS**

#### 51 **Ethics approval and consent to participate**

52 Informed Consent

53  
54 A suitably trained interviewer will inform potential participants about the purpose, methods and  
55 demands of the study. We will obtain verbal consent from all study participants or their guardians.  
56  
57  
58

1  
2  
3 Persons aged 18 years and older will be interviewed following informed consent. It will be at the  
4 parent's or guardian's discretion as to whether a child aged between 15 and 18 years is interviewed  
5 directly, following informed parental/guardian consent. Parents/guardians will be interviewed for  
6 cases aged less than 15 years, after informed consent is obtained.  
7  
8

#### 9 Confidentiality

10 All information and identifiers will be kept confidential. Names and personal identifiers will be  
11 collected and entered into computer records but will be password protected. No personal identifiers  
12 will be included in any published materials relating to this study. All hard copy questionnaires  
13 containing patient identifiers will be stored in locked filing cabinets in a secure location to which only  
14 study investigators and interviewers will have access.  
15  
16  
17  
18

#### 19 Risks and Benefits

20 Participants will be informed there are no individual benefits associated with the study and that  
21 participation is voluntary. Failure to participate or a withdrawal of participation will not affect any  
22 future treatment. There is also no risk to the patient, and the only cost is time spent – approximately  
23 20 minutes – being interviewed. They may refuse to answer any of the questions or stop at any time.  
24  
25  
26  
27

#### 28 Animal Ethics

29 All procedures involving live animals will be performed in accordance with a protocol approved by  
30 the University of Melbourne's Animal Ethics Committee (ethics ID: 1714156).  
31  
32  
33

#### 34 Consent for publication

35 Not applicable.  
36  
37

#### 38 **Availability of data and materials**

39 The Illumina read sets produced as part of this study will be published at INSDC (Sequence Read  
40 Archive (DDJB/NCBI) or the European Nucleotide Archive (EMBL-EBI))  
41

#### 42 **Competing interests**

43 No authors have any competing interests to declare.  
44  
45

#### 46 **Funding**

47 This CampySource project was supported by an NHMRC partnership grant 1116294 and  
48 contributions from Queensland Health, Food Standards Australia New Zealand, AgriFutures Australia  
49 – Chicken Meat Program, Commonwealth Department of Health, and New South Wales Department  
50 of Primary Industries.  
51  
52  
53

54 MDK is supported by a National Health and Medical Research Council Fellowship (GNT1145997).  
55  
56  
57  
58  
59  
60

### Author contributions

MDK conceived the original idea for this study. All authors contributed to the study design and analysis plan. LV and RJS wrote the first draft with contributions from all authors. LF was heavily involved in determining timing and logistics in and between all sites. KL assisted in questionnaire design and flow. DB developed the bioinformatics analysis protocol. LV, RJS, LS, MDK and KG were involved in multiple revisions. The final version of the manuscript was approved by all authors.

### REFERENCES

1. The OzFoodNet Working Group. Monitoring the incidence and causes of diseases potentially transmitted by food in Australia: Annual report of the OzFoodNet network, 2011. *Annual Report* 2011; 39(2). [http://www.health.gov.au/internet/main/publishing.nsf/Content/cda-cdi3902-pdf-cnt.htm/\\$FILE/cdi3902g.pdf](http://www.health.gov.au/internet/main/publishing.nsf/Content/cda-cdi3902-pdf-cnt.htm/$FILE/cdi3902g.pdf).
2. Kaakoush NO, Castaño-Rodríguez N, Mitchell HM, et al. Global Epidemiology of Campylobacter Infection. *Clin Microbiol Rev* 2015;28(3):687-720. doi: 10.1128/cmr.00006-15
3. Ford L, Kirk MD, Glass K, et al. Sequelae of Foodborne Illness Caused by 5 Pathogens, Australia, Circa 2010. *Emerg Infect Dis* 2014;20(11):1865. doi: 10.3201/eid2011.131316
4. Fernandes AM, Balasegaram S, Willis C, et al. Partial Failure of Milk Pasteurization as a Risk for the Transmission of Campylobacter From Cattle to Humans. *Clin Infect Dis* 2015;61(6):903-09. doi: 10.1093/cid/civ431
5. Commonwealth of Australia. National Notifiable Diseases Surveillance System, 2018.
6. Hall G, Yohannes K, Raupach J, et al. Estimating Community Incidence of Salmonella, Campylobacter, and Shiga Toxin-producing Escherichia coli Infections, Australia. *Emerg Infect Dis* 2008;14(10):1601-09. doi: 10.3201/eid1410.071042
7. The Institute of Environmental Science and Research Ltd. Notifiable Diseases in New Zealand: Annual Report 2014. Porirua, New Zealand, 2015.
8. Cressey P, Lake R. Estimated incidence of foodborne illness in New Zealand: application of overseas models and multipliers, 2011.
9. Lastovica AJ, Allos BM. Clinical Significance of Campylobacter and Related Species Other Than Campylobacter jejuni and Campylobacter coli. In: Nachamkin I, Szymanski CM, Blaser MJ, eds. *Campylobacter*, Third Edition: American Society of Microbiology 2008.
10. Fricker CR, Park RWA. A two-year study of the distribution of 'thermophilic' campylobacters in human, environmental and food samples from the Reading area with particular reference to toxin production and heat-stable serotype. *J Appl Bacteriol* 1989;67(6):477-90. doi: 10.1111/j.1365-2672.1989.tb02530.x
11. Blaser MJ, Taylor DN, Feldman RA. Epidemiology of Campylobacter jejuni Infections. *Epidemiol Rev* 1983;5(1):157-76.
12. Stern NJ, Hernandez MP, Blankenship L, et al. Prevalence and Distribution of Campylobacter jejuni and Campylobacter coli in Retail Meats. *J Food Prot* 1985;48(7):595-99.
13. Wood RC, MacDonald KL, Osterholm MT. Campylobacter enteritis outbreaks associated with drinking raw milk during youth activities: A 10-year review of outbreaks in the United States. *JAMA* 1992;268(22):3228-30. doi: 10.1001/jama.1992.03490220072031
14. Vally H, Glass K, Ford L, et al. Proportion of illness acquired by foodborne transmission for nine enteric pathogens in Australia: an expert elicitation. *Foodborne Pathog Dis* 2014;11(9):727-33. doi: 10.1089/fpd.2014.1746
15. Kirk M, Ford L, Glass K, et al. Foodborne illness, Australia, circa 2000 and circa 2010. *Emerg Infect Dis* 2014;20(11):1857-64. doi: 10.3201/eid2011.131315
16. Heymann DL, editor. *Control of Communicable Diseases Manual*. 19th ed. Maryland: United Book Press, Inc., 2008.

17. Pebody RG, Ryan MJ, Wall PG. Outbreaks of campylobacter infection: rare events for a common pathogen. *Commun Dis Rep CDR Rev* 1997;7(3):R33-7. [published Online First: 1997/03/07]
18. Tauxe Robert V, Hargrett-Bean N, Patton CM. Campylobacter Isolates in the United States, 1982-1986. *MMWR Surveill Summ* 1988;37(S S-2):1-13.
19. Sammarco ML, Ripabelli G, Fanelli I, et al. Prevalence and Biomolecular Characterization of Campylobacter spp. Isolated from Retail Meat. *J Food Prot* 2010;73(4):720-28.
20. Whyte P, McGill K, Cowley D, et al. Occurrence of Campylobacter in retail foods in Ireland. *Int J Food Microbiol* 2004;95(2):111-18. doi: 10.1016/j.ijfoodmicro.2003.10.018
21. Wong TL, Hollis L, Cornelius A, et al. Prevalence, Numbers, and Subtypes of Campylobacter jejuni and Campylobacter coli in Uncooked Retail Meat Samples. *J Food Prot* 2007;70(3):566-73.
22. Noormohamed A, Fakhr MK. A Higher Prevalence Rate of Campylobacter in Retail Beef Livers Compared to Other Beef and Pork Meat Cuts. *Int J Environ Res Public Health* 2013;10(5):2058.
23. Samuel M, Reilly K, Shallow S, et al. Burden of Campylobacter infection in the United States and declining trend in California, FoodNet 1996-1998. International Conference on Abstract Emerging Infectious Diseases. Atlanta, GA, 2000.
24. French NP, Marshall JC, the Molecular Epidemiology and Public Health Laboratory. Source Attribution Studies for Campylobacteriosis in New Zealand: Massey University, 2014.
25. Müllner P, Spencer SEF, Wilson DJ, et al. Assigning the source of human campylobacteriosis in New Zealand: A comparative genetic and epidemiological approach. *Infect Genet Evol* 2009;9(6):1311-19. doi: 10.1016/j.meegid.2009.09.003
26. Stafford Russell J, Schluter PJ, Kirk MD, et al. A multi-centre prospective case-control study of campylobacter infection in persons aged 5 years and older in Australia. *Epidemiol Infect* 2007;135(6):978-88. doi: 10.1017/S0950268806007576
27. Merritt TD, Combs B, Pingault N. Campylobacter outbreaks associated with poultry liver dishes. *Commun Dis Intell Q Rep* 2011;35(4):299-300.
28. Li D, Liu C-M, Luo R, et al. MEGAHIT: an ultra-fast single-node solution for large and complex metagenomics assembly via succinct de Bruijn graph. *Bioinformatics (Oxford, England)* 2015;31(10):1674-6. doi: 10.1093/bioinformatics/btv033 [published Online First: 2015/01/23]
29. Seemann T. Prokka: rapid prokaryotic genome annotation. *Bioinformatics (Oxford, England)* 2014;30(14):2068-9. doi: 10.1093/bioinformatics/btu153 [published Online First: 2014/03/20]
30. Glass K, Fearnley E, Hocking H, et al. Bayesian Source Attribution of Salmonellosis in South Australia. *Risk Anal* 2016;36(3):561-70. doi: 10.1111/risa.12444
31. Hald T, Vose D, Wegener HC, et al. A Bayesian Approach to Quantify the Contribution of Animal-Food Sources to Human Salmonellosis. *Risk Anal* 2004;24(1):255-69. doi: 10.1111/j.0272-4332.2004.00427.x
32. Sears A, Baker MG, Wilson N, et al. Marked Campylobacteriosis Decline after Interventions Aimed at Poultry, New Zealand. *Emerg Infect Dis* 2011;17(6):1007. doi: 10.3201/eid1706.101272
33. Müllner P, Jones G, Noble A, et al. Source attribution of food-borne zoonoses in New Zealand: a modified Hald model. *Risk Anal* 2009;29(7):970-84. doi: 10.1111/j.1539-6924.2009.01224.x
34. Lunn DJ, Thomas A, Best N, et al. WinBUGS - A Bayesian modelling framework: Concepts, structure, and extensibility. *Stat Comput* 2000;10(4):325-37. doi: 10.1023/a:1008929526011
35. Dearlove BL, Cody AJ, Pascoe B, et al. Rapid host switching in generalist Campylobacter strains erodes the signal for tracing human infections. *ISME J* 2015;10:721. doi: 10.1038/ismej.2015.149
36. Mather AE, Vaughan TG, French NP. Molecular Approaches to Understanding Transmission and Source Attribution in Nontyphoidal Salmonella and Their Application in Africa. *Clin Infect Dis* 2015;61(suppl\_4):S259-S65. doi: 10.1093/cid/civ727

- 1  
2  
3 37. Mughini Gras L, Smid JH, Wagenaar JA, et al. Risk Factors for Campylobacteriosis of Chicken,  
4 Ruminant, and Environmental Origin: A Combined Case-Control and Source Attribution  
5 Analysis. *PLoS One* 2012;7(8):e42599. doi: 10.1371/journal.pone.0042599  
6 38. Kulldorff M, Heffernan R, Hartman J, et al. A Space-Time Permutation Scan Statistic for Disease  
7 Outbreak Detection. *PLoS Med* 2005;2(3):e59. doi: 10.1371/journal.pmed.0020059  
8 39. Touray K, Adetifa IM, Jallow A, et al. Spatial analysis of tuberculosis in an Urban West African  
9 setting: is there evidence of clustering? *Trop Med Int Health* 2010;15(6):664-72. doi:  
10 10.1111/j.1365-3156.2010.02533.x  
11  
12  
13  
14  
15  
16  
17  
18  
19  
20  
21  
22  
23  
24  
25  
26  
27  
28  
29  
30  
31  
32  
33  
34  
35  
36  
37  
38  
39  
40  
41  
42  
43  
44  
45  
46  
47  
48  
49  
50  
51  
52  
53  
54  
55  
56  
57  
58  
59  
60

For peer review only

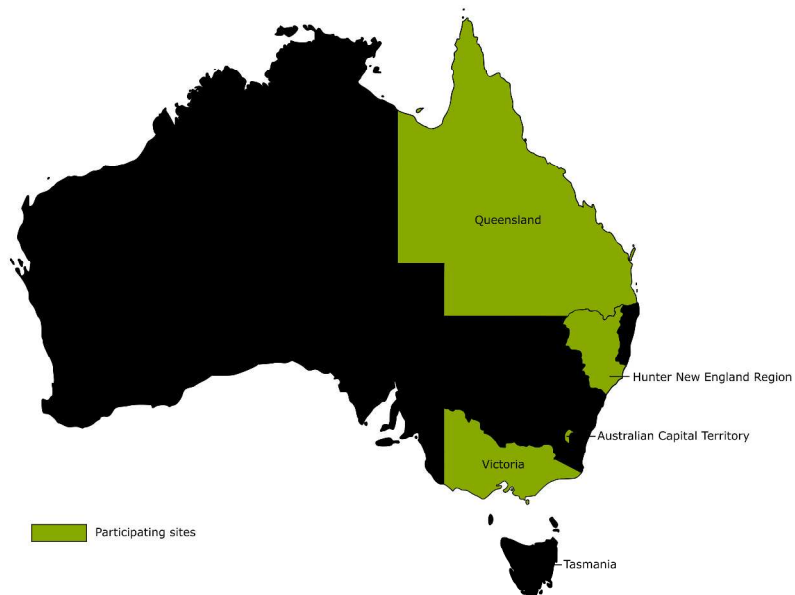

Figure 1. Map of Australian states and territories, showing the Hunter New England region.

1  
2  
3  
4  
5  
6  
7  
8  
9  
10  
11  
12  
13  
14  
15  
16  
17  
18  
19  
20  
21  
22  
23  
24  
25  
26  
27  
28  
29  
30  
31  
32  
33  
34  
35  
36  
37  
38  
39  
40  
41  
42  
43  
44  
45  
46  
47  
48  
49  
50  
51  
52  
53  
54  
55  
56  
57  
58  
59  
60

---

|            |                          |
|------------|--------------------------|
| Refusal    | <input type="checkbox"/> |
| Ineligible | <input type="checkbox"/> |

---

|           |                                                                                                                                                                         |
|-----------|-------------------------------------------------------------------------------------------------------------------------------------------------------------------------|
| ID Number | <input type="text"/> |
|-----------|-------------------------------------------------------------------------------------------------------------------------------------------------------------------------|

---

|                      |                                                                                                                                                    |
|----------------------|----------------------------------------------------------------------------------------------------------------------------------------------------|
| Interview Date       | <input type="text"/> |
| Interview Start Time | _____                                                                                                                                              |

---

|              |                                                                                                                                                    |
|--------------|----------------------------------------------------------------------------------------------------------------------------------------------------|
| Data entered | <input type="checkbox"/>                                                                                                                           |
| Date         | <input type="text"/> |
| Data checked | <input type="checkbox"/>                                                                                                                           |
| Date         | <input type="text"/> |

---

**Source Attribution of *Campylobacter* in Australia Study**

**Case Questionnaire**

For peer review only



## INTRODUCTION

**Interviewer Note:** If case is less than 15 years of age you will need to speak to parent or guardian most familiar with the eating habits of the child.

If case is aged between 15–17 years you will need to obtain parent or guardian consent prior to interview.

Please note that for subjects under the age of 15 years, questions relate to the case, not the person being interviewed unless specified in the body of the questionnaire.

**“Hello, my name is <Interviewers Name> and I am calling on behalf of [Queensland Health / ACT Health / Hunter New England Public Health Unit].”**

**“May I please speak with <name of case> or <name of case’s mother/father>?”**

**Interviewer Note:** When the case comes to the phone then repeat the introduction and proceed with the explanatory statement.

If the case is unavailable then arrange an alternative time for the interview

**“The Australian National University in conjunction with the [state health department] is conducting a study of *Campylobacter* infection in Australia to identify possible causes. *Campylobacter* infections are notifiable to health departments in each state and territory throughout Australia. We understand that you recently experienced an illness due to the *Campylobacter* bacteria. We would like to find out more about your *Campylobacter* illness. Your participation is voluntary, all responses are confidential and if there are any questions you do not wish to answer, just say so.”**

**“Would you be prepared to answer some questions about your illness and activities prior to your illness? The questions will take approximately 20 minutes.”** Yes  No

**“In this study, we will collect information on foods you ate and activities you undertook prior to your illness. Your participation is voluntary and you can stop at any time. No individual information will be presented in any reports or presentations. Partners in this research will comply with the Australian Privacy Act 1988. An information sheet about this research project is available on the ANU website.**

**“Would you like me to send you a copy or provide you with the link?”** Yes  No

If yes, “Could you give me an address/email?” \_\_\_\_\_

**“This study has been approved by the Australian National University Ethics Committee (Protocol 2016/426). If you have any concerns please direct them to Human Research Ethics Committee Research Services Office, Chancellery 10B The Australian National University, ACT 2601 Tel: 6125 7945 Fax: 6125 4807 Email: Human.Ethics.Officer@anu.edu.au”**

**“Do you have any further questions about the project?”** Yes  No

**Do you agree to participate in the project?** Yes  No

**“Do you have the time right now to answer these questions?”**

**If NO, arrange an alternative time to phone back to conduct the interview**

**If YES, continue**

## 1. ELIGIBILITY QUESTIONS

“Because I will be asking about specific dates around the time of your illness, it may be helpful for you to have a calendar or diary in front of you. Do you need a few minutes to get these?”

- Yes, I will get one no.....
- No, I already have one with me.....
- Don't have access to a calendar .....

The first few questions we'll be asking you are about some symptoms that are associated with [your/their] illness.

1. For the purposes of this study, we define diarrhoea as 3 or more loose stools or bowel movements in any 24-hour period. When you had your *Campylobacter* infection, did you have diarrhoea?

- Yes .....  1 **Go to Q2**
- No.....  2 **Check ineligible box then END INTERVIEW**
- Don't know/Not sure .....  7 **Check ineligible box then END INTERVIEW**

- 1a During this diarrhoeal illness, what was the maximum number of stools or bowel movements you had in any 24 hour period?

- 0-2 .....  1 **Check ineligible box then END INTERVIEW**  
(If response = '0-2', then recode Q.1 as = '2')
- 3-5 .....  2
- 6-10.....  3
- 11-20.....  4
- More than 20.....  5
- Don't know/Not sure .....  7

2. For how many days did your diarrhoea last? **DAYS**

Don't know/Not sure .....  77

### CALCULATE PRIOR TO INTERVIEW

Date stool specimen collected

|                      |                      |                      |                      |                      |                      |
|----------------------|----------------------|----------------------|----------------------|----------------------|----------------------|
| <input type="text"/> |
| Day                  |                      | Month                |                      | Year                 |                      |

3. Could you please let me know what the date was when your diarrhoea began?

|                      |                      |                      |                      |                      |                      |
|----------------------|----------------------|----------------------|----------------------|----------------------|----------------------|
| <input type="text"/> |
| Day                  |                      | Month                |                      | Year                 |                      |

(If person is unsure of date then prompt with date of stool specimen)

Don't know/Not sure .....  7 **Check ineligible box then END INTERVIEW**

I will now just enter a couple of other dates that we will be talking about throughout the interview. I won't be a moment....

**Interviewer Note:** Refer to your calendar to determine the interval from DATE 4 WEEKS BEFORE DIARRHOEA BEGAN to DATE 1 DAY BEFORE DIARRHOEA BEGAN.

- 1  
2  
3  
4  
5  
6  
7  
8  
9
4. In the 4 weeks before your illness began, that is from <DATE 4 WEEKS BEFORE DIARRHOEA> through <DATE 1 DAY BEFORE DIARRHOEA BEGAN>, did anyone else in your household test positive for *Campylobacter*?
- Yes.....  1      **Check ineligible box then END INTERVIEW**  
 No .....  2  
 Don't know/Not sure .....  7

- 10  
11  
12  
13  
14  
15  
16  
17  
18  
19
5. In the 4 weeks before your illness began, that is from <DATE 4 WEEKS BEFORE DIARRHOEA> through <DATE 1 DAY BEFORE DIARRHOEA BEGAN>, did anyone else in your household have diarrhoea?
- Yes .....  1      **Check ineligible box then END INTERVIEW**  
 No .....  2  
 Don't know/Not sure .....  7

|                          |                                                                                                                                 |
|--------------------------|---------------------------------------------------------------------------------------------------------------------------------|
| <b>Interviewer Note:</b> | Refer to your calendar to determine the interval from DATE 2 WEEKS BEFORE DIARRHOEA BEGAN to DATE 1 DAY BEFORE DIARRHOEA BEGAN. |
|--------------------------|---------------------------------------------------------------------------------------------------------------------------------|

- 20  
21  
22  
23  
24  
25  
26  
27  
28  
29  
30  
31  
32  
33  
34  
35  
36  
37  
38  
39  
40  
41  
42  
43  
44  
45  
46  
47  
48  
49  
50  
51  
52  
53  
54  
55  
56  
57  
58  
59  
60
6. In the 2 weeks before your illness began, that is from <DATE 2 WEEKS BEFORE DIARRHOEA> through <DATE 1 DAY BEFORE DIARRHOEA BEGAN>, did you travel overseas or interstate?
- INTERVIEWER NOTE:  
 IF participant answers "yes",  
 1. Clarify if the travel was overseas or interstate  
 2. If travel was interstate:  
 Clarify the length of time spent interstate in the time period just mentioned
- Options to select:  
 A. If the participant has travelled overseas or spent the whole two weeks interstate: (Select option Yes)  
 B. If the participant has travelled interstate only for a portion of the time: (Select option No)
- Yes.....  1      **Check ineligible box then END INTERVIEW**  
 No.....  2  
 Don't know/Not sure.....  7

## 2. HEALTH QUESTIONS

### 7. During this illness, did you have any of the following symptoms?

|                             | Yes                        | No                         | DK/NS                      |
|-----------------------------|----------------------------|----------------------------|----------------------------|
| a. Fever.....               | <input type="checkbox"/> 1 | <input type="checkbox"/> 2 | <input type="checkbox"/> 7 |
| b. Vomiting.....            | <input type="checkbox"/> 1 | <input type="checkbox"/> 2 | <input type="checkbox"/> 7 |
| c. Stomach cramps.....      | <input type="checkbox"/> 1 | <input type="checkbox"/> 2 | <input type="checkbox"/> 7 |
| d. Blood in your stool..... | <input type="checkbox"/> 1 | <input type="checkbox"/> 2 | <input type="checkbox"/> 7 |
| e. Nausea.....              | <input type="checkbox"/> 1 | <input type="checkbox"/> 2 | <input type="checkbox"/> 7 |
| f. Headache.....            | <input type="checkbox"/> 1 | <input type="checkbox"/> 2 | <input type="checkbox"/> 7 |
| g. Muscle/body aches.....   | <input type="checkbox"/> 1 | <input type="checkbox"/> 2 | <input type="checkbox"/> 7 |

### 8. Did you take any antibiotics as a result of this illness?

|                          |                            |                    |
|--------------------------|----------------------------|--------------------|
| Yes.....                 | <input type="checkbox"/> 1 |                    |
| No.....                  | <input type="checkbox"/> 2 | <b>Go to Q. 10</b> |
| Don't know/Not sure..... | <input type="checkbox"/> 7 | <b>Go to Q. 10</b> |

### 9. What antibiotic(s) were you taking? [Ask person to get tablet bottle, if possible]

|                                                    |                          |                |
|----------------------------------------------------|--------------------------|----------------|
| Azithromycin.....                                  | <input type="checkbox"/> |                |
| Ciprofloxacin.....                                 | <input type="checkbox"/> |                |
| Norfloxacin.....                                   | <input type="checkbox"/> |                |
| Erythromycin.....                                  | <input type="checkbox"/> |                |
| Doxycycline (also known as Doxy or Vibramycin..... | <input type="checkbox"/> |                |
| Other (please specify).....                        | <input type="checkbox"/> | Specify(_____) |
| Don't know/Not sure.....                           | <input type="checkbox"/> |                |

### 10. Were you admitted to hospital overnight because of this illness?

|                          |                            |                    |
|--------------------------|----------------------------|--------------------|
| Yes.....                 | <input type="checkbox"/> 1 |                    |
| No.....                  | <input type="checkbox"/> 2 | <b>Go to Q. 12</b> |
| Don't know/Not sure..... | <input type="checkbox"/> 7 | <b>Go to Q. 12</b> |

### 11. If yes, for how many nights were you hospitalised?

Don't know/Not sure.....  7  NIGHTS

**Interviewer Note:** Refer to your calendar to determine the interval from DATE 4 WEEKS BEFORE DIARRHOEA BEGAN to DATE 1 DAY BEFORE DIARRHOEA BEGAN.

“For the next few questions, I would like to ask you about events which may have occurred in the 4 weeks before your illness began, so again that’s from <DATE 4 WEEKS BEFORE DIARRHOEA BEGAN> to <DATE 1 DAY BEFORE DIARRHOEA BEGAN>.”

### 12. In those 4 weeks, were you taking any antibiotics?

|                           |                            |                    |
|---------------------------|----------------------------|--------------------|
| Yes .....                 | <input type="checkbox"/> 1 |                    |
| No.....                   | <input type="checkbox"/> 2 | <b>Go to Q. 14</b> |
| Don't know/Not sure ..... | <input type="checkbox"/> 7 | <b>Go to Q. 14</b> |

**Interviewer Note:** If person can't remember the name of the antibiotic(s), check the DK/NS box and leave the space blank.

**13. What antibiotic(s) were you taking?** [Ask person to get tablet bottle, if possible]

|                       | DK/NS                      |                                                                                                                                                                                                                                                                                   |  |  |                                         |
|-----------------------|----------------------------|-----------------------------------------------------------------------------------------------------------------------------------------------------------------------------------------------------------------------------------------------------------------------------------|--|--|-----------------------------------------|
| a. Antibiotic 1 _____ | <input type="checkbox"/> 7 | <table border="1" style="display: inline-table; border-collapse: collapse; width: 20px; height: 20px;"> <tr><td> </td></tr> </table> <table border="1" style="display: inline-table; border-collapse: collapse; width: 20px; height: 20px;"> <tr><td> </td></tr> </table> (DD/MM) |  |  | <input type="checkbox"/> 7 <b>DK/NS</b> |
|                       |                            |                                                                                                                                                                                                                                                                                   |  |  |                                         |
|                       |                            |                                                                                                                                                                                                                                                                                   |  |  |                                         |
| b. Antibiotic 2 _____ | <input type="checkbox"/> 7 | <table border="1" style="display: inline-table; border-collapse: collapse; width: 20px; height: 20px;"> <tr><td> </td></tr> </table> <table border="1" style="display: inline-table; border-collapse: collapse; width: 20px; height: 20px;"> <tr><td> </td></tr> </table> (DD/MM) |  |  | <input type="checkbox"/> 7 <b>DK/NS</b> |
|                       |                            |                                                                                                                                                                                                                                                                                   |  |  |                                         |
|                       |                            |                                                                                                                                                                                                                                                                                   |  |  |                                         |
| c. Antibiotic 3 _____ | <input type="checkbox"/> 7 | <table border="1" style="display: inline-table; border-collapse: collapse; width: 20px; height: 20px;"> <tr><td> </td></tr> </table> <table border="1" style="display: inline-table; border-collapse: collapse; width: 20px; height: 20px;"> <tr><td> </td></tr> </table> (DD/MM) |  |  | <input type="checkbox"/> 7 <b>DK/NS</b> |
|                       |                            |                                                                                                                                                                                                                                                                                   |  |  |                                         |
|                       |                            |                                                                                                                                                                                                                                                                                   |  |  |                                         |
| d. Antibiotic 4 _____ | <input type="checkbox"/> 7 | <table border="1" style="display: inline-table; border-collapse: collapse; width: 20px; height: 20px;"> <tr><td> </td></tr> </table> <table border="1" style="display: inline-table; border-collapse: collapse; width: 20px; height: 20px;"> <tr><td> </td></tr> </table> (DD/MM) |  |  | <input type="checkbox"/> 7 <b>DK/NS</b> |
|                       |                            |                                                                                                                                                                                                                                                                                   |  |  |                                         |
|                       |                            |                                                                                                                                                                                                                                                                                   |  |  |                                         |

**14. In those 4 weeks, were you taking any regular medication that decreases stomach acid?**

Yes.....  1

No.....  2 **Go to Q. 16**

Don't know/Not sure.....  7 **Go to Q. 16**

**15. Did you take any of the following in the 4 weeks prior to illness?**

Histamine-2 (H<sub>2</sub>) Receptor blocker

|                              | Yes                        | No                         | DK/NS                      |
|------------------------------|----------------------------|----------------------------|----------------------------|
| a. Zantac (Ranitidine).....  | <input type="checkbox"/> 1 | <input type="checkbox"/> 2 | <input type="checkbox"/> 7 |
| b. Tagamet (Cimetidine)..... | <input type="checkbox"/> 1 | <input type="checkbox"/> 2 | <input type="checkbox"/> 7 |
| c. Pepcid (Famotidine).....  | <input type="checkbox"/> 1 | <input type="checkbox"/> 2 | <input type="checkbox"/> 7 |
| d. Axid (Nizatidine).....    | <input type="checkbox"/> 1 | <input type="checkbox"/> 2 | <input type="checkbox"/> 7 |

Proton Pump Inhibitor

|                               |                            |                            |                            |
|-------------------------------|----------------------------|----------------------------|----------------------------|
| a. Losec (Omeprazole).....    | <input type="checkbox"/> 1 | <input type="checkbox"/> 2 | <input type="checkbox"/> 7 |
| b. Nexium (Esomeprazole)..... | <input type="checkbox"/> 1 | <input type="checkbox"/> 2 | <input type="checkbox"/> 7 |
| c. Somac (Pantoprazole).....  | <input type="checkbox"/> 1 | <input type="checkbox"/> 2 | <input type="checkbox"/> 7 |
| d. Pariet (Rabeprazole).....  | <input type="checkbox"/> 1 | <input type="checkbox"/> 2 | <input type="checkbox"/> 7 |
| e. Zoton (Lansoprazole).....  | <input type="checkbox"/> 1 | <input type="checkbox"/> 2 | <input type="checkbox"/> 7 |

**16. Have you ever been told by a doctor that you have any other long lasting condition or chronic illness in which diarrhoea or vomiting is a major symptom? (e.g. Crohn's disease, irritable bowel syndrome, ulcerative colitis, or stomach or oesophagus problems)**

Yes.....  1 Specify(\_\_\_\_\_)

No.....  2

Don't know/Not sure.....  7

1  
2  
3  
4  
5  
6  
7  
8  
9  
10  
11  
12  
13  
14  
15  
16  
17  
18  
19  
20  
21  
22  
23  
24  
25  
26  
27  
28  
29  
30  
31  
32  
33  
34  
35  
36  
37  
38  
39  
40  
41  
42  
43  
44  
45  
46  
47  
48  
49  
50  
51  
52  
53  
54  
55  
56  
57  
58  
59  
60

**17. In the 4 weeks before onset of illness, did you take or receive any of the following?**

INTERVIEWER NOTE:  
Cyclosporine ("it's an immunosuppressant")

|                                                                      | Yes                        | No                         | DK/NS                      |
|----------------------------------------------------------------------|----------------------------|----------------------------|----------------------------|
| a. Prednisone<br>or other steroids <u>not</u> used on your skin..... | <input type="checkbox"/> 1 | <input type="checkbox"/> 2 | <input type="checkbox"/> 7 |
| b. Cyclosporine .....                                                | <input type="checkbox"/> 1 | <input type="checkbox"/> 2 | <input type="checkbox"/> 7 |
| c. Chemotherapy.....                                                 | <input type="checkbox"/> 1 | <input type="checkbox"/> 2 | <input type="checkbox"/> 7 |
| d. Radiation therapy.....                                            | <input type="checkbox"/> 1 | <input type="checkbox"/> 2 | <input type="checkbox"/> 7 |

For peer review only

**3. EXPOSURES**

**Interviewer Note:** Refer to your calendar to determine the interval from the DATE 7 DAYS BEFORE DIARRHOEA BEGAN to the DATE 1 DAY BEFORE DIARRHOEA BEGAN

**A. WATER**

**“I’m now going to ask you some questions about water that you consumed in the 7 days before your diarrhoea began, that is from [diarr\_7\_days\_prior] to [diarr\_1\_day\_prior].**

**18. What is your main source of drinking water at home? (select one only)**

**INTERVIEWER NOTE:**  
Only read out options if they're unsure

- |                                                  |                          |   |                 |
|--------------------------------------------------|--------------------------|---|-----------------|
| a. A rainwater tank.....                         | <input type="checkbox"/> | 1 |                 |
| b. A river or stream .....                       | <input type="checkbox"/> | 1 |                 |
| c. A private well, bore hole, or spearpoint..... | <input type="checkbox"/> | 1 |                 |
| d. A carrier or tank truck.....                  | <input type="checkbox"/> | 1 |                 |
| e. Municipal water supply (tap water).....       | <input type="checkbox"/> | 1 |                 |
| f. Purchased bottle water.....                   | <input type="checkbox"/> | 1 |                 |
| g. Other water supply.....                       | <input type="checkbox"/> | 1 | Specify (_____) |
| h. Don't know/Unsure.....                        | <input type="checkbox"/> | 1 |                 |

**Interviewer Note:** If person answered “Yes” to “Municipal water supply” or “Purchased bottle water”, skip to Q.21

**19. Do you usually treat your main source of drinking water before drinking?**

If Required PROMPT: Some examples are chlorination, filtration, boiling and UV treatment of the water

- |                          |                          |   |                    |
|--------------------------|--------------------------|---|--------------------|
| Yes.....                 | <input type="checkbox"/> | 1 | Specify (_____)    |
| No.....                  | <input type="checkbox"/> | 2 | <b>Go to Q. 21</b> |
| Don't know/Not sure..... | <input type="checkbox"/> | 7 | <b>Go to Q. 21</b> |

**20. Which of the following treatments are in place? (select all that apply)**

- |                      | <b>Yes</b>                 | <b>No</b>                  | <b>DK/NS</b>               |
|----------------------|----------------------------|----------------------------|----------------------------|
| a. Chlorination..... | <input type="checkbox"/> 1 | <input type="checkbox"/> 2 | <input type="checkbox"/> 7 |
| b. Filtration.....   | <input type="checkbox"/> 1 | <input type="checkbox"/> 2 | <input type="checkbox"/> 7 |
| c. Boiling.....      | <input type="checkbox"/> 1 | <input type="checkbox"/> 2 | <input type="checkbox"/> 7 |
| d. UV treatment..... | <input type="checkbox"/> 1 | <input type="checkbox"/> 2 | <input type="checkbox"/> 7 |
| e. Other.....        | <input type="checkbox"/> 1 | <input type="checkbox"/> 2 | <input type="checkbox"/> 7 |
| Specify (_____)      |                            |                            |                            |
| f. Don't know.....   | <input type="checkbox"/> 1 | <input type="checkbox"/> 2 | <input type="checkbox"/> 7 |

1  
2  
3  
4  
5  
6  
7  
8  
9  
10  
11  
12  
13  
14  
15  
16  
17  
18  
19  
20  
21  
22  
23  
24  
25  
26  
27  
28  
29  
30  
31  
32  
33  
34  
35  
36  
37  
38  
39  
40  
41  
42  
43  
44  
45  
46  
47  
48  
49  
50  
51  
52  
53  
54  
55  
56  
57  
58  
59  
60

**21. Did you drink water from any of the following sources in the 7 days before onset of diarrhoea...?**  
(Select all that apply)

|                                                  | <b>Yes</b>               |   | <b>No</b>                |   | <b>DK/NS</b>             |   |
|--------------------------------------------------|--------------------------|---|--------------------------|---|--------------------------|---|
| a. A rainwater tank.....                         | <input type="checkbox"/> | 1 | <input type="checkbox"/> | 2 | <input type="checkbox"/> | 7 |
| b. A river or stream .....                       | <input type="checkbox"/> | 1 | <input type="checkbox"/> | 2 | <input type="checkbox"/> | 7 |
| c. A private well, bore hole, or spearpoint..... | <input type="checkbox"/> | 1 | <input type="checkbox"/> | 2 | <input type="checkbox"/> | 7 |
| d. A carrier or tank truck.....                  | <input type="checkbox"/> | 1 | <input type="checkbox"/> | 2 | <input type="checkbox"/> | 7 |
| e. Municipal water supply (tap water).....       | <input type="checkbox"/> | 1 | <input type="checkbox"/> | 2 | <input type="checkbox"/> | 7 |
| f. Purchased bottle water.....                   | <input type="checkbox"/> | 1 | <input type="checkbox"/> | 2 | <input type="checkbox"/> | 7 |
| g. Other water supply.....                       | <input type="checkbox"/> | 1 | <input type="checkbox"/> | 2 | <input type="checkbox"/> | 7 |

Specify (\_\_\_\_\_)

For peer review only



**B. DINING LOCATIONS**

**“The next few questions ask about places where you may have eaten food in the 7 days before your illness began. So that is from [diarr\_7\_days\_prior] to through [diarr\_1\_day\_prior]”**

**22. During this time, did you eat any food prepared outside your home, for example takeaway, restaurant, someone else’s home?**

- Yes.....  1
- No.....  2 **Go to Q 24**
- Don't know/Not sure.....  7 **Go to Q 24**

**23. Did you eat any food from the following places?**

- |                                                | Yes                        | No                         | DK/NS                      |
|------------------------------------------------|----------------------------|----------------------------|----------------------------|
| a. Café or restaurant.....                     | <input type="checkbox"/> 1 | <input type="checkbox"/> 2 | <input type="checkbox"/> 7 |
| b. Home cooked meal at someone else’s home.... | <input type="checkbox"/> 1 | <input type="checkbox"/> 2 | <input type="checkbox"/> 7 |
| c. Kebab shop.....                             | <input type="checkbox"/> 1 | <input type="checkbox"/> 2 | <input type="checkbox"/> 7 |
| d. Other fast food/take away outlet.....       | <input type="checkbox"/> 1 | <input type="checkbox"/> 2 | <input type="checkbox"/> 7 |

**23a How many meals prepared outside of your home, were eaten during this 7 day period?**

- 1-2 meals.....  1
- 3-4 meals.....  2
- ≥ 5 meals.....  3
- Don't know/Unsure.....  7

C. DAIRY PRODUCTS

**“I would now like to ask you about the dairy products you may have eaten in the 7 days before your diarrhoea began.”**

24. **Did you drink any raw/unpasteurised milk or eat any products made from raw/unpasteurised milk?**

INTERVIEWER NOTE:

Cold-pressed milk is pasteurised and is not to be included as "raw/unpasteurised".

- |                            | <b>Yes</b>                 | <b>No</b>                  | <b>DK/NS</b>               |
|----------------------------|----------------------------|----------------------------|----------------------------|
| a. Unpasteurised milk..... | <input type="checkbox"/> 1 | <input type="checkbox"/> 2 | <input type="checkbox"/> 7 |
| b. Other products.....     | <input type="checkbox"/> 1 | <input type="checkbox"/> 2 | <input type="checkbox"/> 7 |
| Specify (_____)            |                            |                            |                            |

D. MEAT AND POULTRY

**“I will now ask you some questions about meat and poultry that you may have eaten in the 7 days before your diarrhoea began, that is from <DATE 7 DAYS BEFORE DIARRHOEA BEGAN> through <DATE 1 DAY BEFORE DIARRHOEA BEGAN>.”**

**25. During these 7 days, did you eat any of the following deli meats or cold cuts?**

|                                        | Yes                        | No                         | DK/NS                      |
|----------------------------------------|----------------------------|----------------------------|----------------------------|
| a. Salami/mettwurst .....              | <input type="checkbox"/> 1 | <input type="checkbox"/> 2 | <input type="checkbox"/> 7 |
| b. Cabanossi/cabana/twiggy sticks..... | <input type="checkbox"/> 1 | <input type="checkbox"/> 2 | <input type="checkbox"/> 7 |
| c. Ham/chicken/turkey/beef.....        | <input type="checkbox"/> 1 | <input type="checkbox"/> 2 | <input type="checkbox"/> 7 |
| d. Devon/frankfurts/cheerios.....      | <input type="checkbox"/> 1 | <input type="checkbox"/> 2 | <input type="checkbox"/> 7 |
| e. Liverwurst.....                     | <input type="checkbox"/> 1 | <input type="checkbox"/> 2 | <input type="checkbox"/> 7 |
| f. Other .....                         | <input type="checkbox"/> 1 | <input type="checkbox"/> 2 | <input type="checkbox"/> 7 |
| Specify (.....)                        |                            |                            |                            |

**26. During these 7 days, did you eat any pate?**

|                          |                            |                   |
|--------------------------|----------------------------|-------------------|
| Yes.....                 | <input type="checkbox"/> 1 |                   |
| No.....                  | <input type="checkbox"/> 2 | <b>Go to Q.29</b> |
| Don't know/Not sure..... | <input type="checkbox"/> 7 |                   |

**27. Was the pate eaten,**

|                           |                            |                 |
|---------------------------|----------------------------|-----------------|
| Chicken pate.....         | <input type="checkbox"/> 1 |                 |
| Duck pate.....            | <input type="checkbox"/> 2 |                 |
| Pork pate.....            | <input type="checkbox"/> 3 |                 |
| Another type of pate..... | <input type="checkbox"/> 4 | Specify (.....) |
| Don't know/Not sure.....  | <input type="checkbox"/> 7 |                 |

**28. Was this pate homemade or purchased from a store?**

|                          |                            |
|--------------------------|----------------------------|
| Homemade.....            | <input type="checkbox"/> 1 |
| Store.....               | <input type="checkbox"/> 2 |
| Don't know/Not sure..... | <input type="checkbox"/> 7 |

**29. During these 7 days, did you eat any other meat or poultry? Like beef, lamb, chicken etc.**

INTERVIEWER NOTE:

This does not include eggs

|                          |                            |                   |
|--------------------------|----------------------------|-------------------|
| Yes.....                 | <input type="checkbox"/> 1 |                   |
| No.....                  | <input type="checkbox"/> 2 | <b>Go to Q.49</b> |
| Don't know/Not sure..... | <input type="checkbox"/> 7 |                   |

**BEEF / VEAL**

30. **During these 7 days, did you eat any beef or veal?**

- Yes.....  1  
 No.....  2 **Go to Q. 32**  
 Don't know/Not sure.....  7

31. **During the 7 days prior, did you eat any of the following beef or veal?**

- |                                                                                                               | Yes                        | No                         | DK/N                       |                 |
|---------------------------------------------------------------------------------------------------------------|----------------------------|----------------------------|----------------------------|-----------------|
| a. Minced beef dishes.....<br><i>(eg. bolognese sauce, pie, pastie, lasagne, hamburger patties, sausages)</i> | <input type="checkbox"/> 1 | <input type="checkbox"/> 2 | <input type="checkbox"/> 7 |                 |
| b. Kebabs/souvlaki.....                                                                                       | <input type="checkbox"/> 1 | <input type="checkbox"/> 2 | <input type="checkbox"/> 7 |                 |
| c. Offal.....<br><i>(eg. tripe, liver, tongue)</i>                                                            | <input type="checkbox"/> 1 | <input type="checkbox"/> 2 | <input type="checkbox"/> 7 | Specify (_____) |
| d. Other.....<br><i>(eg. casserole, stir fry, steak, fillet, roast, beef strips)</i>                          | <input type="checkbox"/> 1 | <input type="checkbox"/> 2 | <input type="checkbox"/> 7 |                 |

**PORK**

32. **During these 7 days, did you eat any pork?**

- Yes.....  1 Specify (\_\_\_\_\_)  
 No.....  2 **Go to Q. 34**  
 Don't know/Not sure.....  7

33. **During the 7 days prior, did you eat any of the following pork?**

- |                                                                                                               | Yes                        | No                         | DK/N                       |                 |
|---------------------------------------------------------------------------------------------------------------|----------------------------|----------------------------|----------------------------|-----------------|
| a. Minced pork dishes.....<br><i>(eg. bolognese sauce, pie, pastie, lasagne, hamburger patties, sausages)</i> | <input type="checkbox"/> 1 | <input type="checkbox"/> 2 | <input type="checkbox"/> 7 |                 |
| b. Kebabs/souvlaki.....                                                                                       | <input type="checkbox"/> 1 | <input type="checkbox"/> 2 | <input type="checkbox"/> 7 |                 |
| c. Offal.....<br><i>(eg. tripe, liver, tongue)</i>                                                            | <input type="checkbox"/> 1 | <input type="checkbox"/> 2 | <input type="checkbox"/> 7 | Specify (_____) |
| d. Other.....<br><i>(eg. casserole, stir fry, steak, fillet, roast, pork strips)</i>                          | <input type="checkbox"/> 1 | <input type="checkbox"/> 2 | <input type="checkbox"/> 7 |                 |

**LAMB**

34. **During these 7 days, did you eat any lamb/mutton?**

- Yes.....  1 Specify (\_\_\_\_\_)  
 No.....  2 **Go to Q. 36**  
 Don't know/Not sure.....  7

35. During the 7 days prior, did you eat any of the following lamb/mutton?

|                                                                                                                      | Yes                        | No                         | DK/N                                       |
|----------------------------------------------------------------------------------------------------------------------|----------------------------|----------------------------|--------------------------------------------|
| a. Minced lamb/mutton dishes.....<br><i>(eg. bolognese sauce, pie, pastie, lasagne, hamburger patties, sausages)</i> | <input type="checkbox"/> 1 | <input type="checkbox"/> 2 | <input type="checkbox"/> 7                 |
| b. Kebabs/souvlaki.....                                                                                              | <input type="checkbox"/> 1 | <input type="checkbox"/> 2 | <input type="checkbox"/> 7                 |
| c. Offal.....<br><i>(eg. tripe, liver, tongue)</i>                                                                   | <input type="checkbox"/> 1 | <input type="checkbox"/> 2 | <input type="checkbox"/> 7 Specify (_____) |
| d. Other.....<br><i>(eg. casserole, stir fry, steak, fillet, roast, lamb strips)</i>                                 | <input type="checkbox"/> 1 | <input type="checkbox"/> 2 | <input type="checkbox"/> 7                 |

**GAME MEAT**

36. During these 7 days, did you eat any game meat like kangaroo, wallaby, venison or similar?

Yes.....  1 Specify (\_\_\_\_\_)

No.....  2

Don't know/Not sure.....  7

**POULTRY**

37. How often do you usually consume chicken/poultry meat?

3 or more days per week.....  1

1-2 days per week.....  2

Once per fortnight.....  3

Less often than once per fortnight.....  4

Never.....  5 **Go to Q.46**

Don't know/Not sure.....  7

38. During the 7 days before your illness began, did you eat any chicken or other poultry?

Yes.....  1 **Go to Q.46**

No.....  2 **Go to Q.46**

Don't know/Not sure.....  7

39. How many meals did you eat that contained chicken or other poultry in the 7 days prior to onset of diarrhoea?

1-2 meals.....  1

3-4 meals.....  2

≥ 5 meals.....  3

Don't know/Not sure.....  7

40. **Did you consume any chicken or poultry at home?**

Yes.....  1  
 No.....  2  
 Don't know/Not sure.....  7

**Go to Q.43**

41. **Was the chicken or poultry purchased...?**

(Select all that apply)

Raw and fresh.....  1  
 Raw and frozen.....  2  
 Pre-cooked.....  3  
 Don't know/Not sure.....  4

42. **How was it stored before consumption...?**

(Select all that apply)

INTERVIEWER NOTE:

(On the bench)

This is only to be used if they STORE their meat on the bench, this does not include defrosting their meat on the bench.

In the freezer.....  1  
 In the fridge.....  2  
 On the bench.....  3  
 Don't know/Not sure.....  4

43. **Prior to cooking, was the chicken rinsed or washed under running water ....?**

Yes.....  1  
 No.....  2  
 Don't know/Not sure.....  7

44. **During this did time you eat any of the following cooked meats.....?**

|                                                                                    | Yes                        | No                         | DK/NS                      |
|------------------------------------------------------------------------------------|----------------------------|----------------------------|----------------------------|
| a. Chicken mince.....<br><i>(including hamburger patties, sausages)</i>            | <input type="checkbox"/> 1 | <input type="checkbox"/> 2 | <input type="checkbox"/> 7 |
| b. Chicken kebabs.....                                                             | <input type="checkbox"/> 1 | <input type="checkbox"/> 2 | <input type="checkbox"/> 7 |
| c. Chicken pieces with bones....<br><i>(i.e. wings, drumsticks, whole chicken)</i> | <input type="checkbox"/> 1 | <input type="checkbox"/> 2 | <input type="checkbox"/> 7 |
| d. Chicken pieces without bones.<br><i>(i.e. breast, tenderloins)</i>              | <input type="checkbox"/> 1 | <input type="checkbox"/> 2 | <input type="checkbox"/> 7 |
| e. Offal.....                                                                      | <input type="checkbox"/> 1 | <input type="checkbox"/> 2 | <input type="checkbox"/> 7 |
| specify: liver                                                                     | <input type="checkbox"/> 1 | other _____                |                            |
| f. Duck.....                                                                       | <input type="checkbox"/> 1 | <input type="checkbox"/> 2 | <input type="checkbox"/> 7 |
| g. Turkey.....                                                                     | <input type="checkbox"/> 1 | <input type="checkbox"/> 2 | <input type="checkbox"/> 7 |

1  
2  
3 **45. During this time, on how many days did you eat poultry?**

4 INTERVIEWER NOTE:

- 5 1. A pate is included  
6 2. Eggs are excluded  
7

8 Days: \_\_\_\_\_  
9

10  
11  
12 **46. During this time, on how many days did you eat meat (including poultry)?**

13 INTERVIEWER NOTE:

14 Pate is included

15 Days: \_\_\_\_\_  
16  
17  
18  
19

20  
21 **47. During the 7 days prior to illness, did [you/they] eat any meat product, which was raw, rare or appeared undercooked?**

- 22 Yes.....  1  
23 No.....  2 **Go to Q.49**  
24 Don't know/Not sure.....  7  
25  
26  
27

28  
29 **48. Which of the following meats did [you/they] eat that was undercooked?**

|                                                       | Yes                        | No                         | DK/NS                      |
|-------------------------------------------------------|----------------------------|----------------------------|----------------------------|
| 30 a. Chicken/poultry.....                            | <input type="checkbox"/> 1 | <input type="checkbox"/> 2 | <input type="checkbox"/> 7 |
| 31 b. Beef or veal.....                               | <input type="checkbox"/> 1 | <input type="checkbox"/> 2 | <input type="checkbox"/> 7 |
| 32 c. Pork.....                                       | <input type="checkbox"/> 1 | <input type="checkbox"/> 2 | <input type="checkbox"/> 7 |
| 33 d. Lamb/mutton.....                                | <input type="checkbox"/> 1 | <input type="checkbox"/> 2 | <input type="checkbox"/> 7 |
| 34 e. Game meat.....                                  | <input type="checkbox"/> 1 | <input type="checkbox"/> 2 | <input type="checkbox"/> 7 |
| 35 f. Minced meat items.....                          | <input type="checkbox"/> 1 | <input type="checkbox"/> 2 | <input type="checkbox"/> 7 |
| 36 <i>(eg. including sausages, hamburger patties)</i> |                            |                            |                            |
| 37 g. Offal (specify type)_____.                      | <input type="checkbox"/> 1 | <input type="checkbox"/> 2 | <input type="checkbox"/> 7 |
| 38 h. Other meat.....                                 | <input type="checkbox"/> 1 | <input type="checkbox"/> 2 | <input type="checkbox"/> 7 |
| 39 Specify (_____)                                    |                            |                            |                            |
| 40                                                    |                            |                            |                            |
| 41                                                    |                            |                            |                            |
| 42                                                    |                            |                            |                            |
| 43                                                    |                            |                            |                            |
| 44                                                    |                            |                            |                            |
| 45                                                    |                            |                            |                            |
| 46                                                    |                            |                            |                            |
| 47                                                    |                            |                            |                            |
| 48                                                    |                            |                            |                            |
| 49                                                    |                            |                            |                            |
| 50                                                    |                            |                            |                            |
| 51                                                    |                            |                            |                            |
| 52                                                    |                            |                            |                            |
| 53                                                    |                            |                            |                            |
| 54                                                    |                            |                            |                            |
| 55                                                    |                            |                            |                            |
| 56                                                    |                            |                            |                            |
| 57                                                    |                            |                            |                            |
| 58                                                    |                            |                            |                            |
| 59                                                    |                            |                            |                            |
| 60                                                    |                            |                            |                            |

1  
2  
3  
4  
5  
6  
7  
8  
9  
10  
11  
12  
13  
14  
15  
16  
17  
18  
19  
20  
21  
22  
23  
24  
25  
26  
27  
28  
29  
30  
31  
32  
33  
34  
35  
36  
37  
38  
39  
40  
41  
42  
43  
44  
45  
46  
47  
48  
49  
50  
51  
52  
53  
54  
55  
56  
57  
58  
59  
60

**49. How do you prefer the following meat to be cooked?**

INTERVIEWER NOTE:  
Raw: Not cooked at all  
Rare: Mostly red  
Medium: Pink through out  
Well done: Brown through out

INTERVIEWER NOTE:  
If participant answers Medium/Rare  
select the rarer option.. e.g Rare

|                         | Raw                        | Rare                       | Medium                     | Well done                  |
|-------------------------|----------------------------|----------------------------|----------------------------|----------------------------|
| a. Chicken/Poultry..... | <input type="checkbox"/> 1 | <input type="checkbox"/> 2 | <input type="checkbox"/> 3 | <input type="checkbox"/> 4 |
| b. Beef/Veal.....       | <input type="checkbox"/> 1 | <input type="checkbox"/> 2 | <input type="checkbox"/> 3 | <input type="checkbox"/> 4 |
| c. Pork.....            | <input type="checkbox"/> 1 | <input type="checkbox"/> 2 | <input type="checkbox"/> 3 | <input type="checkbox"/> 4 |
| d. Lamb.....            | <input type="checkbox"/> 1 | <input type="checkbox"/> 2 | <input type="checkbox"/> 3 | <input type="checkbox"/> 4 |
| e. Hamburgers.....      | <input type="checkbox"/> 1 | <input type="checkbox"/> 2 | <input type="checkbox"/> 3 | <input type="checkbox"/> 4 |
| f. Minced meat.....     | <input type="checkbox"/> 1 | <input type="checkbox"/> 2 | <input type="checkbox"/> 3 | <input type="checkbox"/> 4 |



**E. GENERAL KITCHEN PRACTICES**

**“I will now ask you several questions about the way food is usually prepared in your home. Remember, your participation is voluntary and you do not have to answer any of the questions if you don’t want to.”**

**50. How many times per week do you cook for members of your household?**

INTERVIEWER NOTE:

This section around food prepared in the home refers to the person answering the survey (not necessarily the case or control)

- 0.....  1 **Go to Q.63**
- 1-5.....  2
- >5.....  3
- Don't know/Not sure.....  7

**51. Did you handle or prepare any raw meats in the kitchen in the 7 days before your diarrhoea began?**

INTERVIEWER NOTE:

Refers to the person answering the survey

- Yes.....  1
- No.....  2 **Go to Q.57**
- Don't know/Not sure.....  7

**52. Did you handle or prepare raw chicken meat or chicken offal in the 7 days before your diarrhoea began?**

INTERVIEWER NOTE:

Refers to the person answering the survey

- Yes.....  1
- No.....  2
- Don't know/Not sure.....  7

**Interviewer Note:** If person answered “No” to **both** Q.51 and Q.52 then **skip to Q.57**

**53. After a knife is used to cut raw meat or poultry, which of the following options do you usually do?**

INTERVIEWER NOTE:

Refers to the person answering the survey

- Continue using the knife as is.....  1
- Rinse the knife before continuing to cook.....  2
- Wipe the knife before continuing to cook.....  3
- Wash the knife with detergent before continuing.....  4
- Change to another knife.....  5
- Other.....  6 Specify (\_\_\_\_\_)
- No one prepares meat .....  7 **Go to Q. 57**
- Don't know/Not sure.....  8

*Don't read*

1  
2  
3  
4  
5  
6  
7  
8  
9  
10  
11  
12  
13  
14  
15  
16  
17  
18  
19  
20  
21  
22  
23  
24  
25  
26  
27  
28  
29  
30  
31  
32  
33  
34  
35  
36  
37  
38  
39  
40  
41  
42  
43  
44  
45  
46  
47  
48  
49  
50  
51  
52  
53  
54  
55  
56  
57  
58  
59  
60

**54. After a cutting board is used to cut raw meat or poultry, which of the following options do you usually do?**

INTERVIEWER NOTE:

- 1. Does not matter if water is hot or cold
- 2. Refers to the person answering the survey

- Continue using the cutting board as is.....  1
- Rinse the cutting board before continuing to cook.....  2
- Wipe the cutting board before continuing to cook.....  3
- Wash the cutting board with detergent before continuing.....  4
- Change to another cutting board.....  5
- Other.....  6

Specify ( \_\_\_\_\_ )

*Don't read*

- Don't know/Not sure.....  7

**55. After handling raw meat or poultry in the kitchen, which of the following would you usually do before continuing to cook?**

INTERVIEWER NOTE:

Refers to the person answering the survey

- Wipe hands.....  1
- Quickly rinse hands under a running tap.....  2
- Wash hands with soap and water.....  3
- Other.....  4

Specify ( \_\_\_\_\_ )

*Don't read*

- Don't do anything about hands.....  6 **Go to Q.57**
- Don't know/not sure.....  7

**56. After washing hands during food preparation, what would you usually dry your hands on?**

INTERVIEWER NOTE:

Refers to the person answering the survey

- Paper towel .....  10
- Sponge/cloth.....  11
- Tea-towel /hand towel .....  12
- Apron.....  13
- Don't dry hands.....  14
- Other.....  15

Specify ( \_\_\_\_\_ )

*Don't read*

- Don't know/Not sure.....  77

**57. In the past 3 months, has anyone in the household cook meat on a BBQ?**

- Yes.....  1 **Go to Q. 59**
- No.....  2 **Go to Q. 59**
- Don't know/Not sure.....  7 **Go to Q. 59**

1  
2  
3  
4  
5  
6  
7  
8  
9  
10  
11  
12  
13  
14  
15  
16  
17  
18  
19  
20  
21  
22  
23  
24  
25  
26  
27  
28  
29  
30  
31  
32  
33  
34  
35  
36  
37  
38  
39  
40  
41  
42  
43  
44  
45  
46  
47  
48  
49  
50  
51  
52  
53  
54  
55  
56  
57  
58  
59  
60

**58. After cooking on the BBQ, where would the cooked meat most likely be placed?**

- Back on the same container.....  1
- Back on the same container after it has been  
rinsed with water .....  2
- Back on the same container after it has been  
wiped off with a towel.....  3
- Back on the same container, after the container  
has been washed with soap and water.....  4
- On a different container .....  5
- Other.....  6
- Don't know/not sure.....  7

Specify (\_\_\_\_\_)

*Don't read*

For peer review only

F. ANIMAL AND PET EXPOSURE

“The next few questions are about contact with animals in the 7 days before your diarrhoea began.”

**59. During this time, did you keep or care for any of the following animals as pets?**

INTERVIEWER NOTE:  
Not to include one off contact

|                              | Yes                      | No | DK/NS                    |   | Yes                      | No | DK/NS                    |
|------------------------------|--------------------------|----|--------------------------|---|--------------------------|----|--------------------------|
| a. Cat.....                  | <input type="checkbox"/> | 1  | <input type="checkbox"/> | 2 | <input type="checkbox"/> | 7  | <input type="checkbox"/> |
| b. Dog.....                  | <input type="checkbox"/> | 1  | <input type="checkbox"/> | 2 | <input type="checkbox"/> | 7  | <input type="checkbox"/> |
| c. Chickens.....             | <input type="checkbox"/> | 1  | <input type="checkbox"/> | 2 | <input type="checkbox"/> | 7  | <input type="checkbox"/> |
| d. Other birds.....          | <input type="checkbox"/> | 1  | <input type="checkbox"/> | 2 | <input type="checkbox"/> | 7  | <input type="checkbox"/> |
| e. Other .....               | <input type="checkbox"/> | 1  | <input type="checkbox"/> | 2 | <input type="checkbox"/> | 7  | <input type="checkbox"/> |
| f. Do not keep any pets..... | <input type="checkbox"/> | 7  | <b>Go to Q.67</b>        |   |                          |    |                          |

**Is any pet less than 6 months old?**

|                 | Yes                      | No | DK/NS                    |
|-----------------|--------------------------|----|--------------------------|
| Specify (.....) | <input type="checkbox"/> | 1  | <input type="checkbox"/> |
|                 | <input type="checkbox"/> | 2  | <input type="checkbox"/> |
|                 | <input type="checkbox"/> | 7  | <input type="checkbox"/> |

**Interviewer Note:** If person answered No/Don't know to Cat then skip to question 62

**60. Do you feed your cat raw meat or bones?**

|                          |                          |   |                                                             |
|--------------------------|--------------------------|---|-------------------------------------------------------------|
| Yes.....                 | <input type="checkbox"/> | 1 | Specify (.....)                                             |
| No.....                  | <input type="checkbox"/> | 2 | <b>Go to Q. 62</b>                                          |
| Don't know/Not sure..... | <input type="checkbox"/> | 7 | <b>Go to Q. 62</b> (eg. chicken, beef, kangaroo, lamb etc.) |

**61. How often does your cat get fed raw meat or bones?**

|                        |                          |   |
|------------------------|--------------------------|---|
| Daily.....             | <input type="checkbox"/> | 1 |
| Weekly.....            | <input type="checkbox"/> | 2 |
| Monthly.....           | <input type="checkbox"/> | 3 |
| Less often.....        | <input type="checkbox"/> | 4 |
| Don't know/Unsure..... | <input type="checkbox"/> | 7 |

**Interviewer Note:** If person answered No/Don't know to Dog then skip to question 65

**62. Do you feed your dog raw meat?**

|                          |                          |   |                                          |
|--------------------------|--------------------------|---|------------------------------------------|
| Yes.....                 | <input type="checkbox"/> | 1 | Specify (.....)                          |
| No.....                  | <input type="checkbox"/> | 2 | (eg. chicken, beef, kangaroo, lamb etc.) |
| Don't know/Not sure..... | <input type="checkbox"/> | 7 |                                          |

**63. Do you feed your dog raw bones?**

|                          |                          |   |                 |
|--------------------------|--------------------------|---|-----------------|
| Yes.....                 | <input type="checkbox"/> | 1 | Specify (.....) |
| No.....                  | <input type="checkbox"/> | 2 |                 |
| Don't know/Not sure..... | <input type="checkbox"/> | 7 |                 |

**Interviewer Note:** If person answered No/Don't know to questions 62-63 then skip to question 65

**64. How often does your dog get fed raw meat or bones?**

- Daily.....  1
- Weekly.....  2
- Monthly.....  3
- Less often.....  4
- Don't know/Not sure.....  7

**65. Did you get any of your pets in the 4 weeks before your diarrhoea began?**

- Yes.....  1 Pet(s) (\_\_\_\_\_)
- No.....  2
- Don't know/Not sure.....  7

**66. Were any of your own pets ill with diarrhoea in the 7 days before your diarrhoea began?**

- Yes.....  1 Pet(s) (\_\_\_\_\_)
- No.....  2
- Don't know/Not sure.....  7

**67. In the 7 days before your diarrhoea began, did you have contact with household pet faeces or manure (eg. changing litter boxes or picking up pet faeces with a plastic bag)?**

- Yes.....  1 Pet(s) (\_\_\_\_\_)
- No.....  2
- Don't know/Not sure.....  7

**68. Do you live on a farm/hobby farm including a property on acreage 5 acres or over?**

- Yes.....  1
- No.....  2
- Don't know/Not sure.....  7

**69. In the 7 days before your diarrhoea began, did you visit a farm or petting zoo?**

- Yes.....  1 Specify (\_\_\_\_\_)
- No.....  2 (eg. private farm, commercial farm, petting zoo etc.)
- Don't know/Not sure.....  7

#### 4. DEMOGRAPHICS

“I would now like to ask you a few final questions. Remember, your participation is voluntary and you do not have to answer any of the questions if you don't want to.”

**70. Is any language other than English spoken in your household?**

- Yes.....  1 Specify (\_\_\_\_\_)
- No.....  2
- Don't read* Don't know/Not sure.....  7
- Don't read* Refused.....  9

**71. Are you of Aboriginal or Torres Strait Islander origin?**

- No.....  1
- Aboriginal.....  2
- Torres Strait Islander.....  3
- Both.....  4
- Don't read* Don't know/Not sure.....  7
- Don't read* Refused.....  9

**72. Which of the following places best describe where you live?**

- Inner city or urban area.....  1
- Suburban area.....  2
- Town.....  3
- Rural or remote area community.....  4
- Rural or remote area farm or property.....  5
- Don't read* Don't know/Not sure.....  7
- Don't read* Refused.....  9

**Interviewer Note:** See definitions below.

Inner city area:..... *housing close to the centre of a major/capital city*

Suburban area:..... *housing area further from the centre of the city, which is characterised by the region being primarily a self-contained residential district.*

Town:..... *community over 2000 people*

Rural or remote area community:..... *community under 2000*

Rural or remote area farm or property

**73. Does your occupation involve any of the following?**

- Working with raw meat.....  11  
*(eg. restaurants, butchery, abattoir etc.)*
- Working with animals.....  12  
*(eg. farmer, zookeeper, vet/nurse etc.)*
- Other type of occupation.....  13
- Retired.....  14
- CASE not of working age.....  15
- Don't know/Unsure.....  17

74. What is the highest level of education reached by anyone in your household?

- Schooling to year 10 or below.....  12
- Secondary school, above year 10.....  13
- Technical or further educational institution.....  14  
*(eg. TAFE, apprenticeship, college etc.)*
- University degree—Undergraduate .....  15
- University degree—Postgraduate (Masters, doctorate).  16
- Don't know/not sure.....  7
- Refused.....  9

Don't read  
Don't read

“Now I am going to read you a list of income categories. Please stop me when a category best describes your total household income, before taxes, in the last financial year? That is the total figure for all household members.”

75. Last year the total income for your household was....?

- Less than \$25,000.....  1
- \$25,000 to \$50,000.....  2
- Between \$50,000 and \$100,000.....  3
- Between \$100,000 and \$150,000.....  4
- More than \$150,000.....  5
- Don't know/Not sure.....  7
- Refused.....  9

Don't read  
Don't read

76. As part of this research we are planning to do a follow-up study. Would you be happy for us to contact you in ~6 months' time?"

- Yes.....  1
- No.....  2 **Skip to end of questionnaire**

**Interviewer Note:** If person answered No to Q 76 then skip to the end of the questionnaire

**Details required:**

Name: \_\_\_\_\_  
 Phone number: \_\_\_\_\_  
 Email address: \_\_\_\_\_

“That’s my last question. Thank you very much for your time and cooperation.”

**COMPLETE AFTER INTERVIEW**

**Interviewer initials** \_\_\_\_\_

**Interview stop time** \_\_\_\_\_

**Length of interview** \_\_\_\_\_ MINUTES

**Respondent recall:**

- Poor  1
- Fair  2
- Average  3
- Good  4
- Excellent  5
