# Supplementary material for: Investigating locally relevant risk factors for Campylobacter infection in Australia: protocol for a case–control study and genomic analysis
Source: PubMed Central journal article supplement — BMJ Open. 2018 Dec 22;8(12):e026630. doi: 10.1136/bmjopen-2018-026630 (PMC6318611; doi:10.1136/bmjopen-2018-026630), 2018-12-22
Supplement: bmjopen-2018-026630.reviewer_comments.pdf [file bmjopen-2018-026630.reviewer_comments.pdf]

## PEER REVIEW HISTORY

BMJ Open publishes all reviews undertaken for accepted manuscripts. Reviewers are asked to complete a checklist review form (<http://bmjopen.bmj.com/site/about/resources/checklist.pdf>) and are provided with free text boxes to elaborate on their assessment. These free text comments are reproduced below.

## ARTICLE DETAILS

|                            |                                                                                                                                              |
|----------------------------|----------------------------------------------------------------------------------------------------------------------------------------------|
| <b>TITLE (PROVISIONAL)</b> | Investigating locally-relevant risk factors for Campylobacter infection in Australia: protocol for a case-control study and genomic analysis |
| <b>AUTHORS</b>             | Varrone, Liana; Stafford, Russell; Lilly, Kim; Selvey, Linda; Glass, Kathryn; Ford, Laura; Bulach, Dieter; Kirk, Martyn                      |

This article was not externally reviewed at BMJ Open. Protocols that have been independently assessed prior to submission to BMJ Open are usually fast-tracked to publication on the grounds that further substantial changes will not be possible. This independent assessment will usually be external, independent review for both a substantial grant award from a non-commercial or government funder and ethics approval.
